# Supplementary material for: Efficacy and safety of direct oral anticoagulants approved for cardiovascular indications: Systematic review and meta-analysis
Source: PubMed Central journal article supplement (PMC5967718; doi:10.1371/journal.pone.0197583), 2018-05-24

## **Results of Meta-analyses**

Supplement to: Makam RCP, Hoaglin DC, McManus DD, Wang V, Gore JM, Spencer FA, Pradhan R, Tran H, Yu H, Goldberg RJ. Efficacy and safety of direct oral anticoagulants approved for cardiovascular indications: systematic review and meta-analysis.

## Results of Meta-analyses: Non-valvular atrial fibrillation

### Efficacy

#### Data Used

| <b>Trial</b>       | <b>Drug</b> | <b>Sample Size</b> | <b>Stroke or Systemic Embolism (PO)</b> | <b>Systemic Embolism</b> | <b>Any Stroke</b> | <b>Hemorrhagic Stroke</b> | <b>Death from Any Cause</b> | <b>Death from Vascular Causes</b> | <b>Myocardial Infarction</b> |
|--------------------|-------------|--------------------|-----------------------------------------|--------------------------|-------------------|---------------------------|-----------------------------|-----------------------------------|------------------------------|
| <b>ARISTOTLE</b>   | Apixaban    | 9120               | 212                                     | 15                       | 199               | 40                        | 603                         |                                   | 90                           |
| <b>ENGAGE-AF</b>   | Edoxaban    | 7035               | 182                                     | 15                       | 281               | 49                        | 773                         | 530                               | 133                          |
| <b>RE-LY - 150</b> | Dabigatran  | 6076               | 134                                     |                          | 122               | 12                        | 438                         | 274                               | 97                           |
| <b>ROCKET I</b>    | Rivaroxaban | 6958               | 188                                     | 5                        | 184               | 29                        | 208                         | 170                               | 101                          |
| <b>ARISTOTLE</b>   | Warfarin    | 9081               | 265                                     | 17                       | 250               | 78                        | 669                         |                                   | 102                          |
| <b>ENGAGE-AF</b>   | Warfarin    | 7036               | 232                                     | 23                       | 317               | 90                        | 839                         | 611                               | 141                          |
| <b>RE-LY - 150</b> | Warfarin    | 6022               | 202                                     |                          | 186               | 45                        | 487                         | 317                               | 75                           |
| <b>ROCKET I</b>    | Warfarin    | 7004               | 241                                     | 22                       | 221               | 50                        | 250                         | 193                               | 126                          |

## Stroke or systemic embolism

Generalized linear mixed model fit by maximum likelihood (Adaptive Gauss-Hermite Quadrature, nAGQ = 7) ['glmerMod']

Family: binomial ( logit )

Formula: cbind(ADEs[, i], nADEs[, i]) ~ as.factor(arm) + as.factor(id) + (-1 + arm | id)

| AIC  | BIC  | logLik | deviance | df.resid |
|------|------|--------|----------|----------|
| 14.2 | 14.7 | -1.1   | 2.2      | 2        |

Scaled residuals:

| Min      | 1Q       | Median  | 3Q      | Max     |
|----------|----------|---------|---------|---------|
| -0.99625 | -0.24489 | 0.01467 | 0.28001 | 0.87612 |

Random effects:

| Groups | Name | Variance | Std.Dev. |
|--------|------|----------|----------|
|--------|------|----------|----------|

|    |     |   |   |
|----|-----|---|---|
| id | arm | 0 | 0 |
|----|-----|---|---|

Number of obs: 8, groups: id, 4

Fixed effects:

|                 | Estimate | Std. Error | z value | Pr(> z )     |
|-----------------|----------|------------|---------|--------------|
| (Intercept)     | -3.48348 | 0.05131    | -67.90  | < 2e-16 ***  |
| as.factor(arm)1 | -0.28148 | 0.05031    | -5.59   | 2.21e-08 *** |
| as.factor(id)2  | 0.11877  | 0.06815    | 1.74    | 0.0814 .     |
| as.factor(id)3  | 0.06000  | 0.07223    | 0.83    | 0.4062       |
| as.factor(id)4  | 0.16306  | 0.06753    | 2.41    | 0.0158 *     |

---

Signif. codes: 0 '\*\*\*' 0.001 '\*\*' 0.01 '\*' 0.05 '.' 0.1 ' ' 1

Correlation of Fixed Effects:

| (Intr)      | as.()1 | as.()2 | as.()3 |       |
|-------------|--------|--------|--------|-------|
| as.fctr(r)1 | -0.426 |        |        |       |
| as.fctr(d)2 | -0.616 | 0.000  |        |       |
| as.fctr(d)3 | -0.581 | -0.001 | 0.438  |       |
| as.fctr(d)4 | -0.622 | 0.002  | 0.468  | 0.442 |

### Odds Ratio of Studies for Stroke or Systemic Embolism (PO)

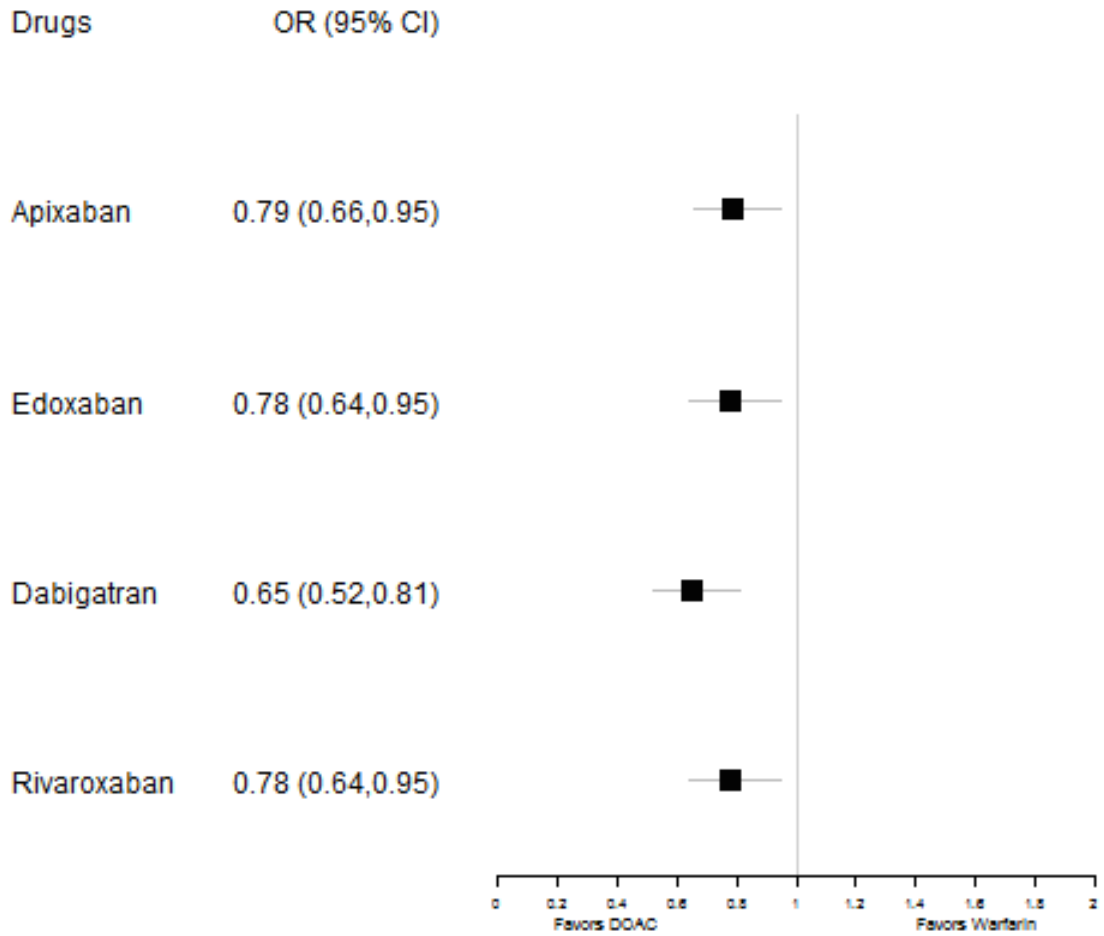

## Systemic embolism

Generalized linear mixed model fit by maximum likelihood (Adaptive Gauss-Hermite Quadrature, nAGQ = 7) ['glmerMod']  
Family: binomial ( logit )  
Formula: cbind(ADEs[, i], nADEs[, i]) ~ as.factor(arm) + as.factor(id) + (-1 + arm | id)

| AIC  | BIC  | logLik | deviance | df.resid |
|------|------|--------|----------|----------|
| 15.7 | 14.6 | -2.8   | 5.7      | 1        |

Scaled residuals:

| Min      | 1Q       | Median  | 3Q      | Max     |
|----------|----------|---------|---------|---------|
| -1.43128 | -0.59779 | 0.04713 | 0.79839 | 1.05525 |

Random effects:

| Groups | Name | Variance | Std.Dev. |
|--------|------|----------|----------|
| id     | arm  | 0.009755 | 0.09877  |

Number of obs: 6, groups: id, 3

Fixed effects:

|                 | Estimate | Std. Error | z value | Pr(> z )   |
|-----------------|----------|------------|---------|------------|
| (Intercept)     | -6.1055  | 0.2783     | -21.937 | <2e-16 *** |
| as.factor(arm)1 | -0.5800  | 0.2611     | -2.222  | 0.0263 *   |
| as.factor(id)2  | 0.4368   | 0.2821     | 1.549   | 0.1215     |
| as.factor(id)4  | 0.1206   | 0.5722     | 0.211   | 0.8331     |

---

Signif. codes: 0 '\*\*\*' 0.001 '\*\*' 0.01 '\*' 0.05 '.' 0.1 ' ' 1

Correlation of Fixed Effects:

| (Intr)      | as.()1 | as.()2 |       |
|-------------|--------|--------|-------|
| as.fctr(r)1 | 0.158  |        |       |
| as.fctr(d)2 | -0.768 | -0.262 |       |
| as.fctr(d)4 | -0.836 | -0.475 | 0.639 |

### Odds Ratio of Studies for Systemic Embolism

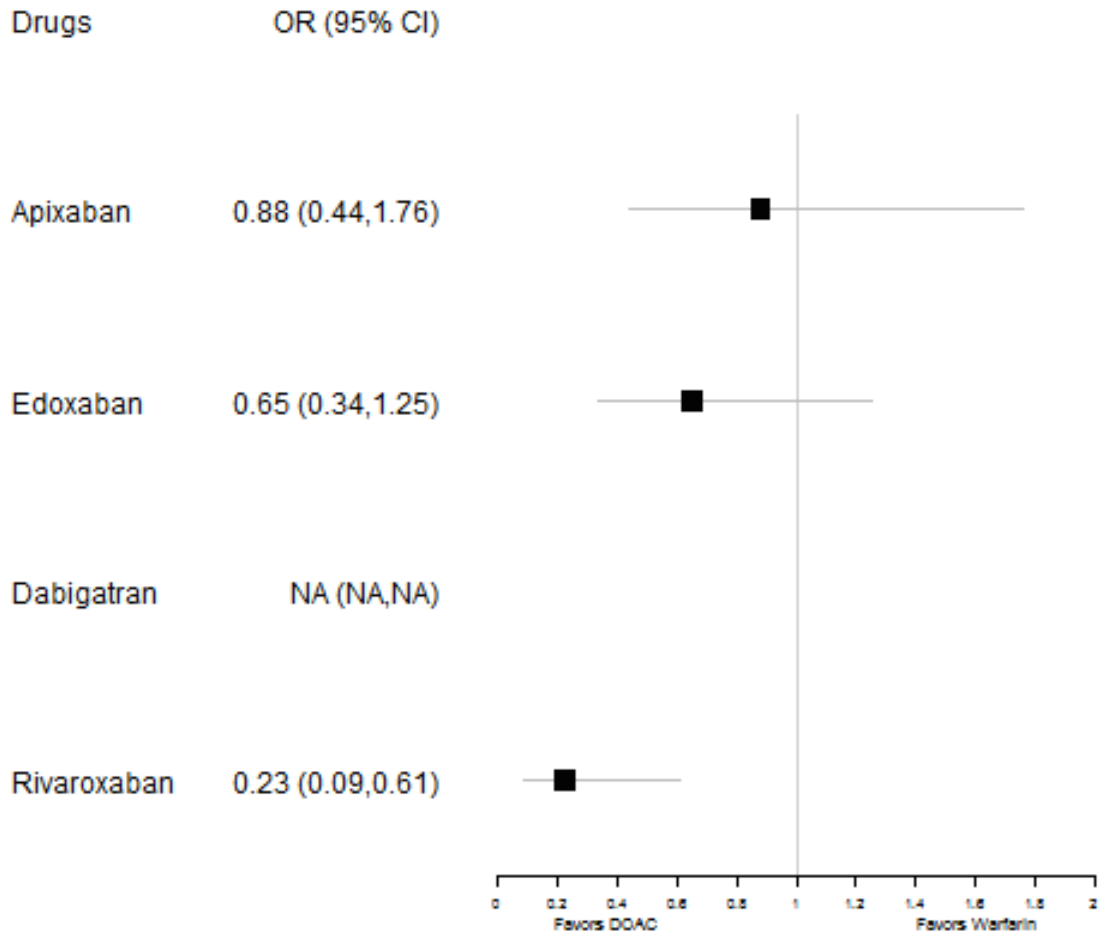

## Any stroke

Generalized linear mixed model fit by maximum likelihood (Adaptive Gauss-Hermite Quadrature, nAGQ = 7) ['glmerMod']

Family: binomial ( logit )

Formula: cbind(ADEs[, i], nADEs[, i]) ~ as.factor(arm) + as.factor(id) + (-1 + arm | id)

| AIC  | BIC  | logLik | deviance | df.resid |
|------|------|--------|----------|----------|
| 17.0 | 17.5 | -2.5   | 5.0      | 2        |

Scaled residuals:

| Min      | 1Q       | Median   | 3Q      | Max     |
|----------|----------|----------|---------|---------|
| -1.38088 | -0.39535 | -0.00596 | 0.43917 | 1.24798 |

Random effects:

| Groups | Name | Variance | Std.Dev. |
|--------|------|----------|----------|
|--------|------|----------|----------|

|    |     |   |   |
|----|-----|---|---|
| id | arm | 0 | 0 |
|----|-----|---|---|

Number of obs: 8, groups: id, 4

Fixed effects:

|                 | Estimate | Std. Error | z value | Pr(> z )    |
|-----------------|----------|------------|---------|-------------|
| (Intercept)     | -3.57156 | 0.05255    | -67.97  | < 2e-16 *** |
| as.factor(arm)1 | -0.22261 | 0.04872    | -4.57   | 4.9e-06 *** |
| as.factor(id)2  | 0.56235  | 0.06349    | 8.86    | < 2e-16 *** |
| as.factor(id)3  | 0.03259  | 0.07495    | 0.43    | 0.664       |
| as.factor(id)4  | 0.16591  | 0.06948    | 2.39    | 0.017 *     |

---

Signif. codes: 0 '\*\*\*' 0.001 '\*\*' 0.01 '\*' 0.05 '.' 0.1 ' ' 1

Correlation of Fixed Effects:

| (Intr)      | as.()1 | as.()2 | as.()3 |       |
|-------------|--------|--------|--------|-------|
| as.fctr(r)1 | -0.416 |        |        |       |
| as.fctr(d)2 | -0.684 | -0.001 |        |       |
| as.fctr(d)3 | -0.580 | -0.001 | 0.480  |       |
| as.fctr(d)4 | -0.626 | 0.002  | 0.518  | 0.439 |

### Odds Ratio of Studies for Any Stroke

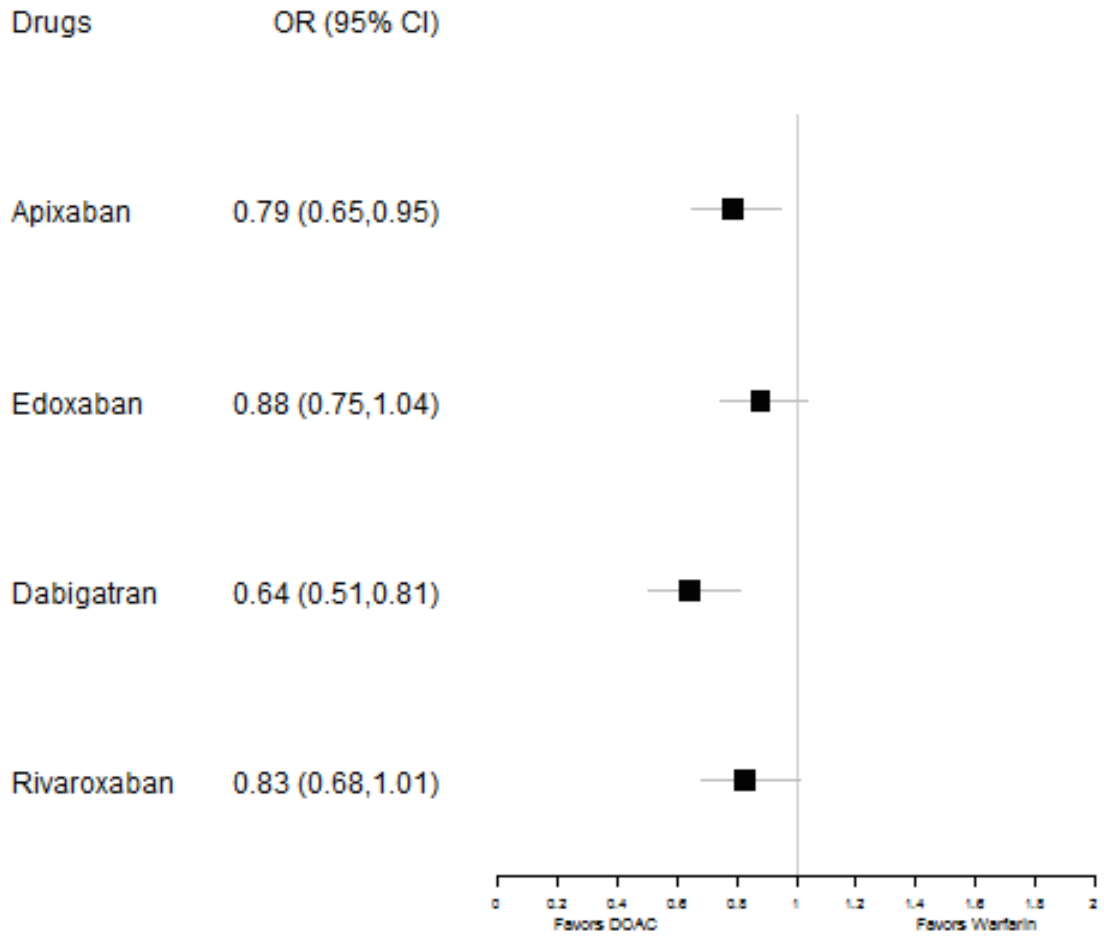



## Hemorrhagic stroke

Generalized linear mixed model fit by maximum likelihood (Adaptive Gauss-Hermite Quadrature, nAGQ = 7) ['glmerMod']

Family: binomial ( logit )

Formula: cbind(ADEs[, i], nADEs[, i]) ~ as.factor(arm) + as.factor(id) + (-1 + arm | id)

| AIC  | BIC  | logLik | deviance | df.resid |
|------|------|--------|----------|----------|
| 17.0 | 17.4 | -2.5   | 5.0      | 2        |

Scaled residuals:

| Min      | 1Q       | Median  | 3Q      | Max     |
|----------|----------|---------|---------|---------|
| -1.59536 | -0.33959 | 0.02125 | 0.48220 | 1.12681 |

Random effects:

| Groups | Name | Variance | Std.Dev. |
|--------|------|----------|----------|
|--------|------|----------|----------|

|    |     |   |   |
|----|-----|---|---|
| id | arm | 0 | 0 |
|----|-----|---|---|

Number of obs: 8, groups: id, 4

Fixed effects:

|                 | Estimate | Std. Error | z value | Pr(> z )     |
|-----------------|----------|------------|---------|--------------|
| (Intercept)     | -4.73703 | 0.09907    | -47.82  | < 2e-16 ***  |
| as.factor(arm)1 | -0.71079 | 0.10756    | -6.61   | 3.89e-11 *** |
| as.factor(id)2  | 0.42421  | 0.12574    | 3.37    | 0.000742 *** |
| as.factor(id)3  | -0.32039 | 0.16178    | -1.98   | 0.047657 *   |
| as.factor(id)4  | -0.13888 | 0.14586    | -0.95   | 0.341011     |

---

Signif. codes: 0 '\*\*\*' 0.001 '\*\*' 0.01 '\*' 0.05 '.' 0.1 ' ' 1

Correlation of Fixed Effects:

| (Intr)      | as.()1 | as.()2 | as.()3 |       |
|-------------|--------|--------|--------|-------|
| as.fctr(r)1 | -0.361 |        |        |       |
| as.fctr(d)2 | -0.685 | 0.000  |        |       |
| as.fctr(d)3 | -0.533 | 0.000  | 0.420  |       |
| as.fctr(d)4 | -0.591 | 0.002  | 0.465  | 0.362 |

### Odds Ratio of Studies for Hemorrhagic Stroke

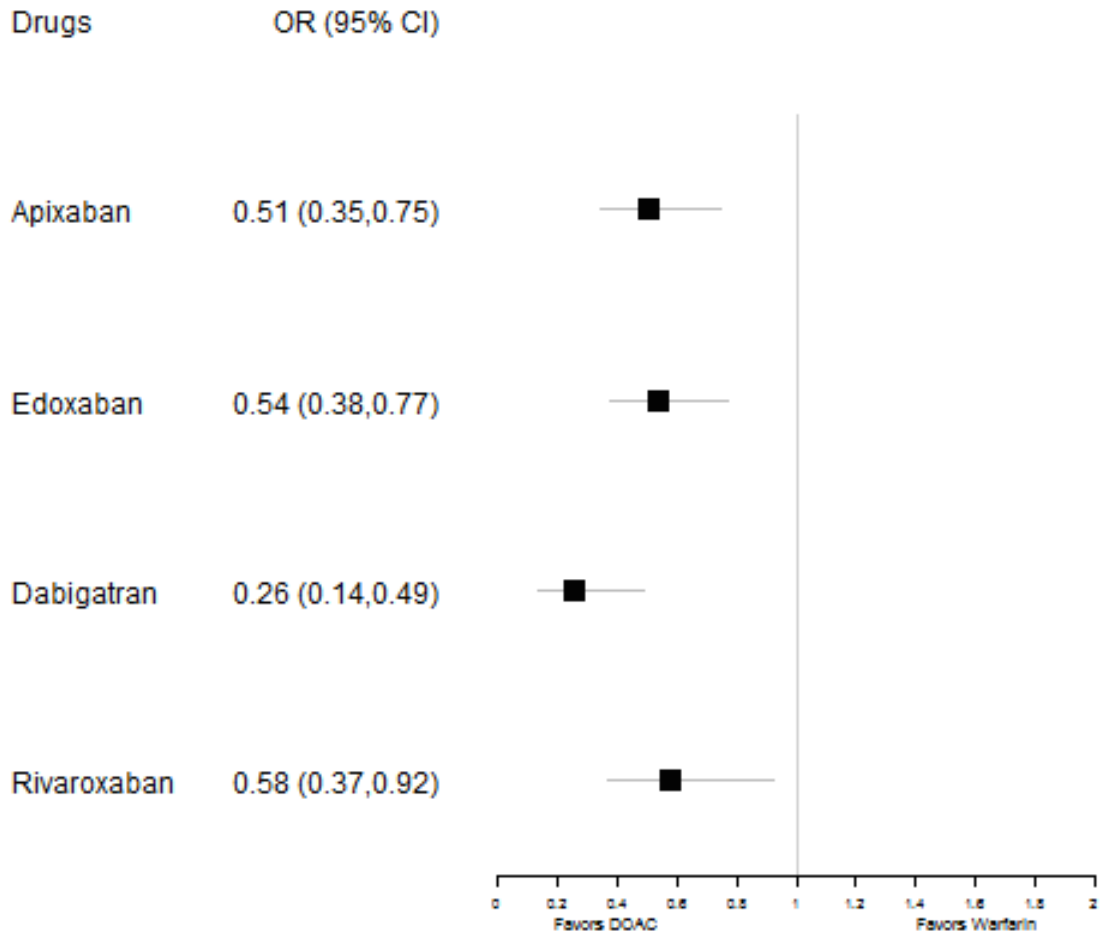

## Death from any cause

Generalized linear mixed model fit by maximum likelihood (Adaptive Gauss-Hermite Quadrature, nAGQ = 7) ['glmerMod']

Family: binomial ( logit )

Formula: cbind(ADEs[, i], nADEs[, i]) ~ as.factor(arm) + as.factor(id) + (-1 + arm | id)

| AIC  | BIC  | logLik | deviance | df.resid |
|------|------|--------|----------|----------|
| 12.7 | 13.2 | -0.4   | 0.7      | 2        |

Scaled residuals:

| Min      | 1Q       | Median  | 3Q      | Max     |
|----------|----------|---------|---------|---------|
| -0.50637 | -0.13996 | 0.00019 | 0.14102 | 0.47788 |

Random effects:

| Groups | Name | Variance | Std.Dev. |
|--------|------|----------|----------|
|--------|------|----------|----------|

|    |     |   |   |
|----|-----|---|---|
| id | arm | 0 | 0 |
|----|-----|---|---|

Number of obs: 8, groups: id, 4

Fixed effects:

|                 | Estimate | Std. Error | z value | Pr(> z )     |
|-----------------|----------|------------|---------|--------------|
| (Intercept)     | -2.53133 | 0.03283    | -77.10  | < 2e-16 ***  |
| as.factor(arm)1 | -0.11691 | 0.03203    | -3.65   | 0.000263 *** |
| as.factor(id)2  | 0.54349  | 0.03932    | 13.82   | < 2e-16 ***  |
| as.factor(id)3  | 0.09713  | 0.04490    | 2.16    | 0.030526 *   |
| as.factor(id)4  | -0.79588 | 0.05571    | -14.29  | < 2e-16 ***  |

---

Signif. codes: 0 '\*\*\*' 0.001 '\*\*' 0.01 '\*' 0.05 '.' 0.1 ' ' 1

Correlation of Fixed Effects:

| (Intr)      | as.()1 | as.()2 | as.()3 |       |
|-------------|--------|--------|--------|-------|
| as.fctr(r)1 | -0.464 |        |        |       |
| as.fctr(d)2 | -0.654 | -0.001 |        |       |
| as.fctr(d)3 | -0.573 | -0.001 | 0.479  |       |
| as.fctr(d)4 | -0.464 | 0.003  | 0.386  | 0.338 |

### Odds Ratio of Studies for Death from Any Cause

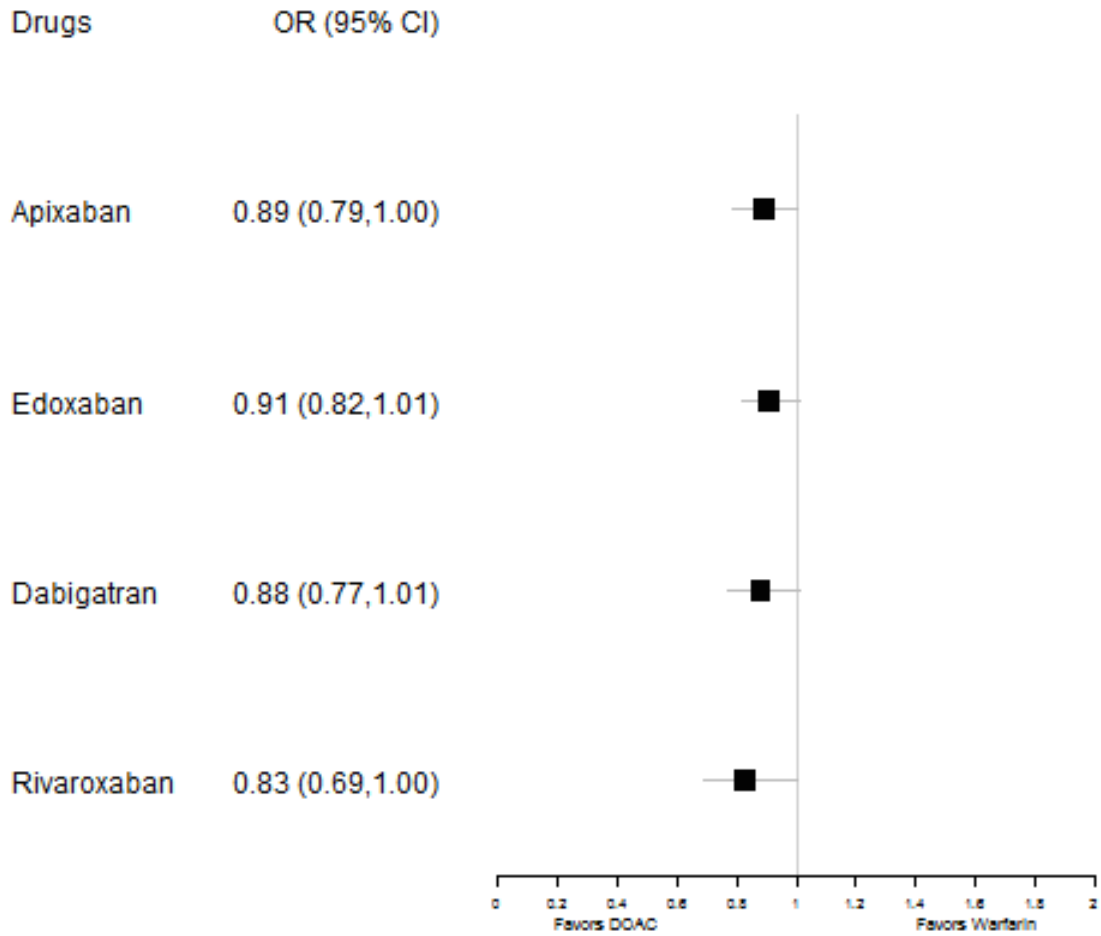

## Death from vascular causes

Generalized linear mixed model fit by maximum likelihood (Adaptive Gauss-Hermite Quadrature, nAGQ = 7) ['glmerMod']

Family: binomial ( logit )

Formula: cbind(ADEs[, i], nADEs[, i]) ~ as.factor(arm) + as.factor(id) + (-1 + arm | id)

| AIC  | BIC | logLik | deviance | df.resid |
|------|-----|--------|----------|----------|
| 10.1 | 9.0 | 0.0    | 0.1      | 1        |

Scaled residuals:

| Min       | 1Q        | Median    | 3Q       | Max      |
|-----------|-----------|-----------|----------|----------|
| -0.177361 | -0.082998 | -0.001193 | 0.077870 | 0.191178 |

Random effects:

Groups Name Variance Std.Dev.

id arm 0 0

Number of obs: 6, groups: id, 3

Fixed effects:

|                 | Estimate | Std. Error | z value | Pr(> z )     |
|-----------------|----------|------------|---------|--------------|
| (Intercept)     | -2.35440 | 0.03746    | -62.86  | < 2e-16 ***  |
| as.factor(arm)1 | -0.15130 | 0.04523    | -3.34   | 0.000823 *** |
| as.factor(id)3  | -0.54109 | 0.05228    | -10.35  | < 2e-16 ***  |
| as.factor(id)4  | -1.19626 | 0.06151    | -19.45  | < 2e-16 ***  |

---

Signif. codes: 0 '\*\*\*' 0.001 '\*\*' 0.01 '\*' 0.05 '.' 0.1 ' ' 1

Correlation of Fixed Effects:

|             | (Intr) | as.()1 | as.()3 |
|-------------|--------|--------|--------|
| as.fctr(r)1 | -0.566 |        |        |
| as.fctr(d)3 | -0.487 | 0.000  |        |
| as.fctr(d)4 | -0.417 | 0.004  | 0.297  |

### Odds Ratio of Studies for Death from Vascular Causes

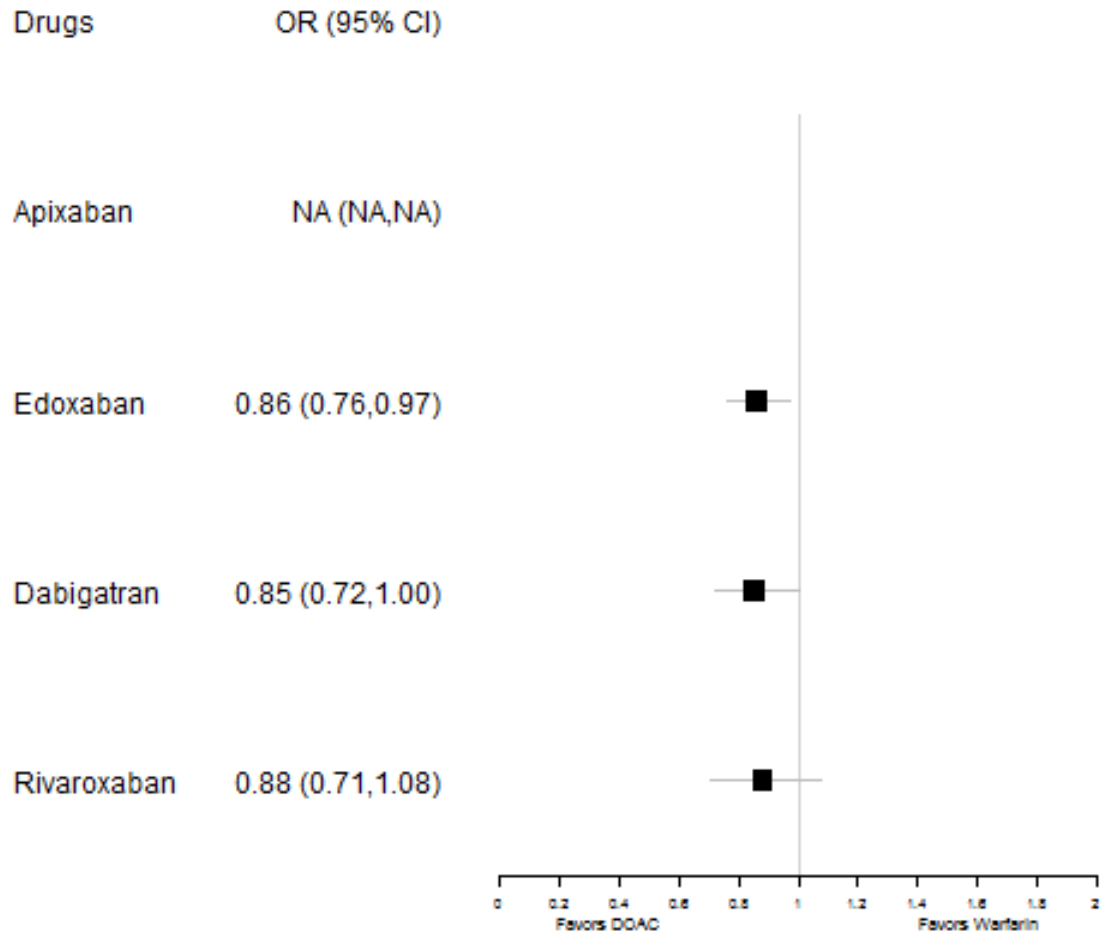

## Myocardial infarction

Generalized linear mixed model fit by maximum likelihood (Adaptive Gauss-Hermite Quadrature, nAGQ = 7) ['glmerMod']

Family: binomial ( logit )

Formula: cbind(ADEs[, i], nADEs[, i]) ~ as.factor(arm) + as.factor(id) + (-1 + arm | id)

| AIC  | BIC  | logLik | deviance | df.resid |
|------|------|--------|----------|----------|
| 17.7 | 18.2 | -2.9   | 5.7      | 2        |

Scaled residuals:

| Min      | 1Q       | Median   | 3Q      | Max     |
|----------|----------|----------|---------|---------|
| -1.39079 | -0.49761 | -0.00034 | 0.48434 | 1.42209 |

Random effects:

Groups Name Variance Std.Dev.

id arm 0 0

Number of obs: 8, groups: id, 4

Fixed effects:

|                 | Estimate | Std. Error | z value | Pr(> z )     |
|-----------------|----------|------------|---------|--------------|
| (Intercept)     | -4.51394 | 0.07989    | -56.51  | < 2e-16 ***  |
| as.factor(arm)1 | -0.05500 | 0.06856    | -0.80   | 0.42243      |
| as.factor(id)2  | 0.62200  | 0.09479    | 6.56    | 5.33e-11 *** |
| as.factor(id)3  | 0.30222  | 0.10565    | 2.86    | 0.00423 **   |
| as.factor(id)4  | 0.43823  | 0.09870    | 4.44    | 9.00e-06 *** |

---

Signif. codes: 0 '\*\*\*' 0.001 '\*\*' 0.01 '\*' 0.05 '.' 0.1 ' ' 1

Correlation of Fixed Effects:

| (Intr)      | as.()1 | as.()2 | as.()3 |       |
|-------------|--------|--------|--------|-------|
| as.fctr(r)1 | -0.419 |        |        |       |
| as.fctr(d)2 | -0.695 | 0.001  |        |       |
| as.fctr(d)3 | -0.623 | -0.001 | 0.526  |       |
| as.fctr(d)4 | -0.668 | 0.002  | 0.563  | 0.505 |

### Odds Ratio of Studies for Myocardial Infarction

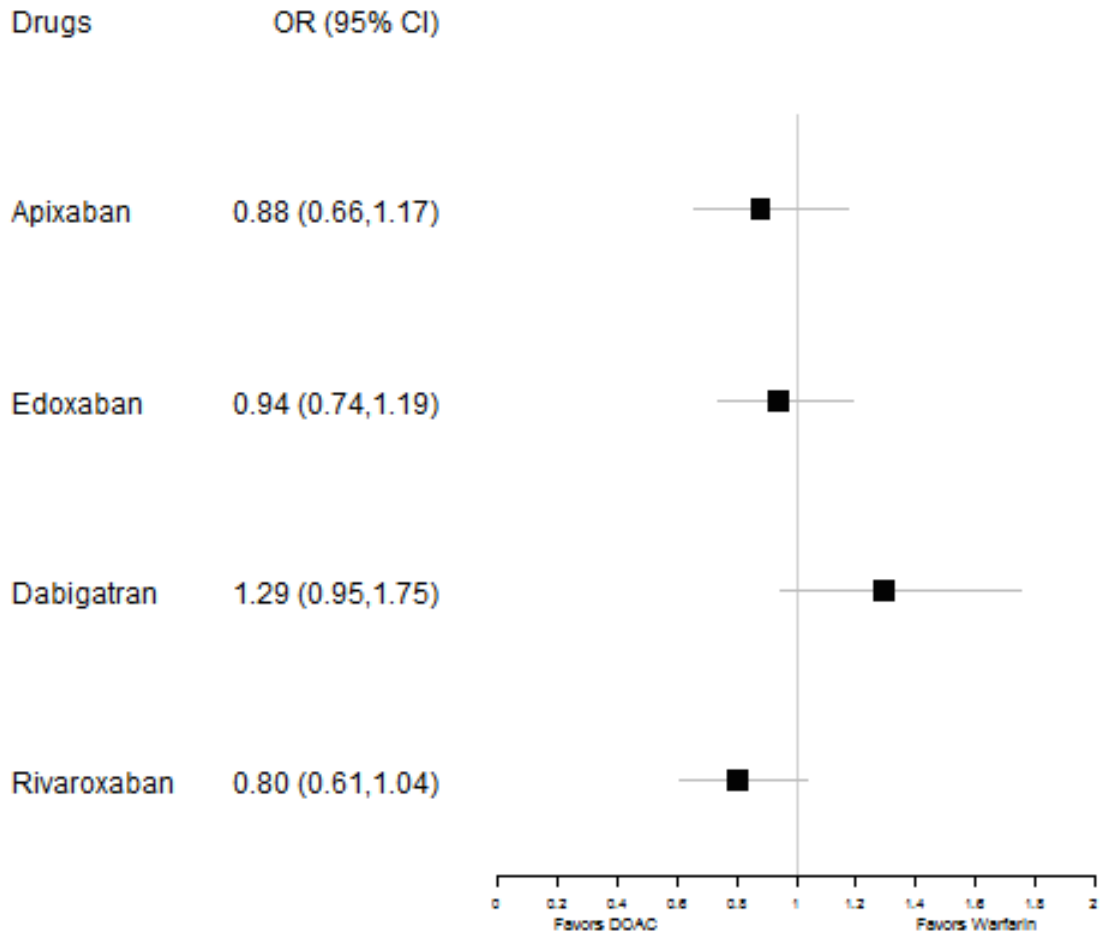



# Safety

## Data Used

| <b>STUDY</b>                         | <b>Drug</b> | <b>Sample Size</b> | <b>Major Bleeding</b> | <b>Fatal Bleeding</b> | <b>Intracranial Bleeding</b> | <b>Gastrointestinal Bleeding</b> |
|--------------------------------------|-------------|--------------------|-----------------------|-----------------------|------------------------------|----------------------------------|
| <b>ARISTOTLE</b>                     | Apixaban    | 9088               | 327                   | 34                    | 52                           | 105                              |
| <b>ENGAGE AF-TIMI 48 (high dose)</b> | Edoxaban    | 7012               | 418                   | 32                    | 61                           | 232                              |
| <b>RE-LY - 150</b>                   | Dabigatran  | 6076               | 399                   |                       | 38                           | 188                              |
| <b>ROCKET AF</b>                     | Rivaroxaban | 7111               | 395                   | 27                    | 55                           | 224                              |
| <b>ARISTOTLE</b>                     | Warfarin    | 9052               | 462                   | 55                    | 122                          | 119                              |
| <b>ENGAGE AF-TIMI 48 (high dose)</b> | Warfarin    | 7012               | 524                   | 59                    | 132                          | 190                              |
| <b>RE-LY - 150</b>                   | Warfarin    | 6022               | 421                   |                       | 90                           | 126                              |
| <b>ROCKET AF</b>                     | Warfarin    | 7125               | 386                   | 55                    | 84                           | 154                              |

## Major bleeding

Generalized linear mixed model fit by maximum likelihood (Adaptive Gauss-Hermite Quadrature, nAGQ = 7) ['glmerMod']

Family: binomial ( logit )

Formula: cbind(ADEs[, i], nADEs[, i]) ~ as.factor(arm) + as.factor(id) + (-1 + arm | id)

| AIC  | BIC  | logLik | deviance | df.resid |
|------|------|--------|----------|----------|
| 24.0 | 24.5 | -6.0   | 12.0     | 2        |

Scaled residuals:

| Min      | 1Q       | Median   | 3Q      | Max     |
|----------|----------|----------|---------|---------|
| -0.55360 | -0.30118 | -0.00809 | 0.30982 | 0.49351 |

Random effects:

| Groups | Name | Variance | Std.Dev. |
|--------|------|----------|----------|
|--------|------|----------|----------|

|    |     |         |        |
|----|-----|---------|--------|
| id | arm | 0.01477 | 0.1215 |
|----|-----|---------|--------|

Number of obs: 8, groups: id, 4

Fixed effects:

|                 | Estimate | Std. Error | z value | Pr(> z )     |
|-----------------|----------|------------|---------|--------------|
| (Intercept)     | -2.94592 | 0.04901    | -60.11  | < 2e-16 ***  |
| as.factor(arm)1 | -0.16368 | 0.07060    | -2.32   | 0.0204 *     |
| as.factor(id)2  | 0.42121  | 0.06342    | 6.64    | 3.10e-11 *** |
| as.factor(id)3  | 0.36998  | 0.07007    | 5.28    | 1.29e-07 *** |
| as.factor(id)4  | 0.11146  | 0.07467    | 1.49    | 0.1355       |

---

Signif. codes: 0 '\*\*\*' 0.001 '\*\*' 0.01 '\*' 0.05 '.' 0.1 ' ' 1

Correlation of Fixed Effects:

| (Intr)      | as.()1 | as.()2 | as.()3 |       |
|-------------|--------|--------|--------|-------|
| as.fctr(r)1 | -0.165 |        |        |       |
| as.fctr(d)2 | -0.719 | 0.008  |        |       |
| as.fctr(d)3 | -0.720 | -0.013 | 0.522  |       |
| as.fctr(d)4 | -0.717 | -0.018 | 0.510  | 0.561 |

### Odds Ratio of Studies for Major Bleeding

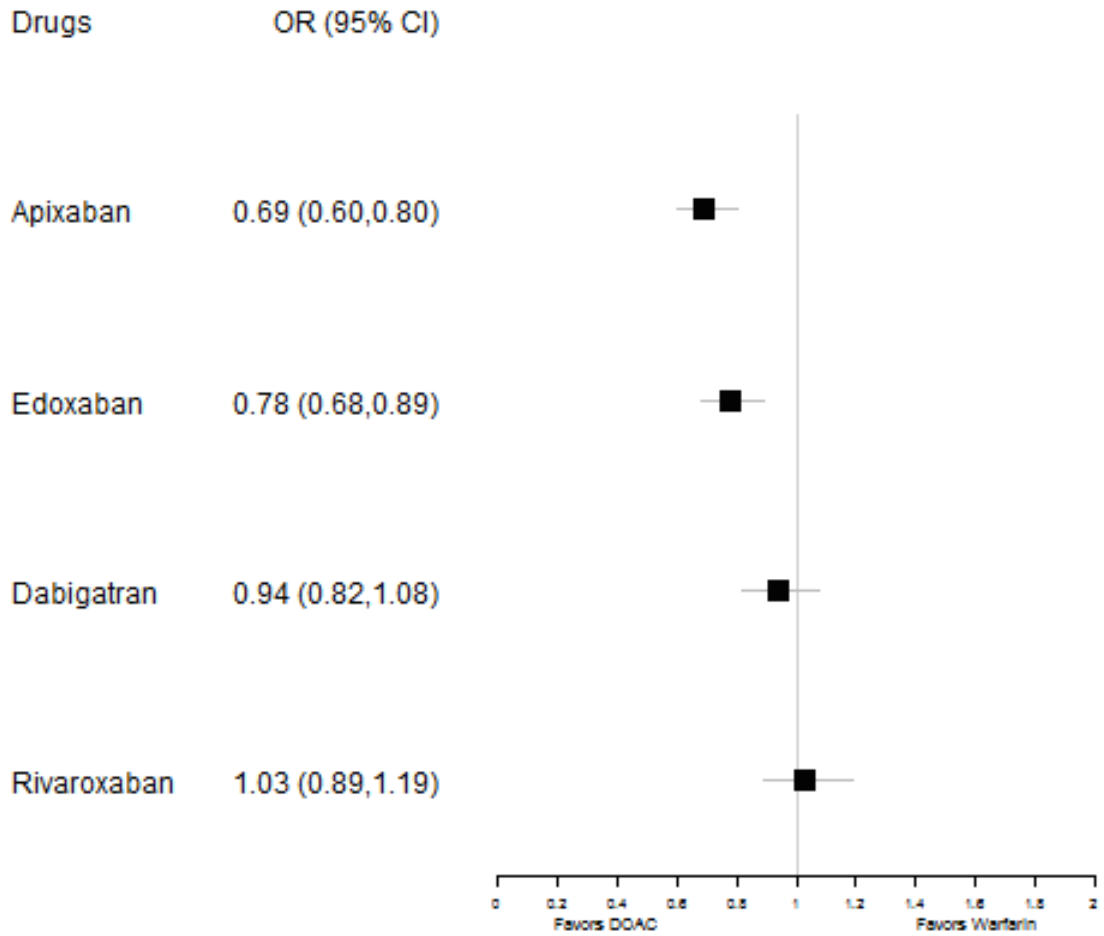

## Fatal bleeding

Generalized linear mixed model fit by maximum likelihood (Adaptive Gauss-Hermite Quadrature, nAGQ = 7) ['glmerMod']

Family: binomial ( logit )

Formula: cbind(ADEs[, i], nADEs[, i]) ~ as.factor(arm) + as.factor(id) + (-1 + arm | id)

| AIC  | BIC | logLik | deviance | df.resid |
|------|-----|--------|----------|----------|
| 10.5 | 9.5 | -0.3   | 0.5      | 1        |

Scaled residuals:

| Min     | 1Q      | Median  | 3Q     | Max    |
|---------|---------|---------|--------|--------|
| -0.3823 | -0.2467 | -0.0067 | 0.2225 | 0.4188 |

Random effects:

| Groups | Name | Variance | Std.Dev. |
|--------|------|----------|----------|
|--------|------|----------|----------|

|    |     |   |   |
|----|-----|---|---|
| id | arm | 0 | 0 |
|----|-----|---|---|

Number of obs: 6, groups: id, 3

Fixed effects:

|                 | Estimate | Std. Error | z value | Pr(> z )     |
|-----------------|----------|------------|---------|--------------|
| (Intercept)     | -5.0552  | 0.1159     | -43.63  | < 2e-16 ***  |
| as.factor(arm)1 | -0.6014  | 0.1295     | -4.65   | 3.39e-06 *** |
| as.factor(id)2  | 0.2807   | 0.1495     | 1.88    | 0.0605 .     |
| as.factor(id)4  | 0.1605   | 0.1535     | 1.05    | 0.2958       |

---

Signif. codes: 0 '\*\*\*' 0.001 '\*\*' 0.01 '\*' 0.05 '.' 0.1 ' ' 1

Correlation of Fixed Effects:

|             | (Intr) | as.()1 | as.()2 |
|-------------|--------|--------|--------|
| as.fctr(r)1 | -0.398 |        |        |
| as.fctr(d)2 | -0.652 | 0.000  |        |
| as.fctr(d)4 | -0.635 | 0.001  | 0.492  |

### Odds Ratio of Studies for Fatal Bleeding

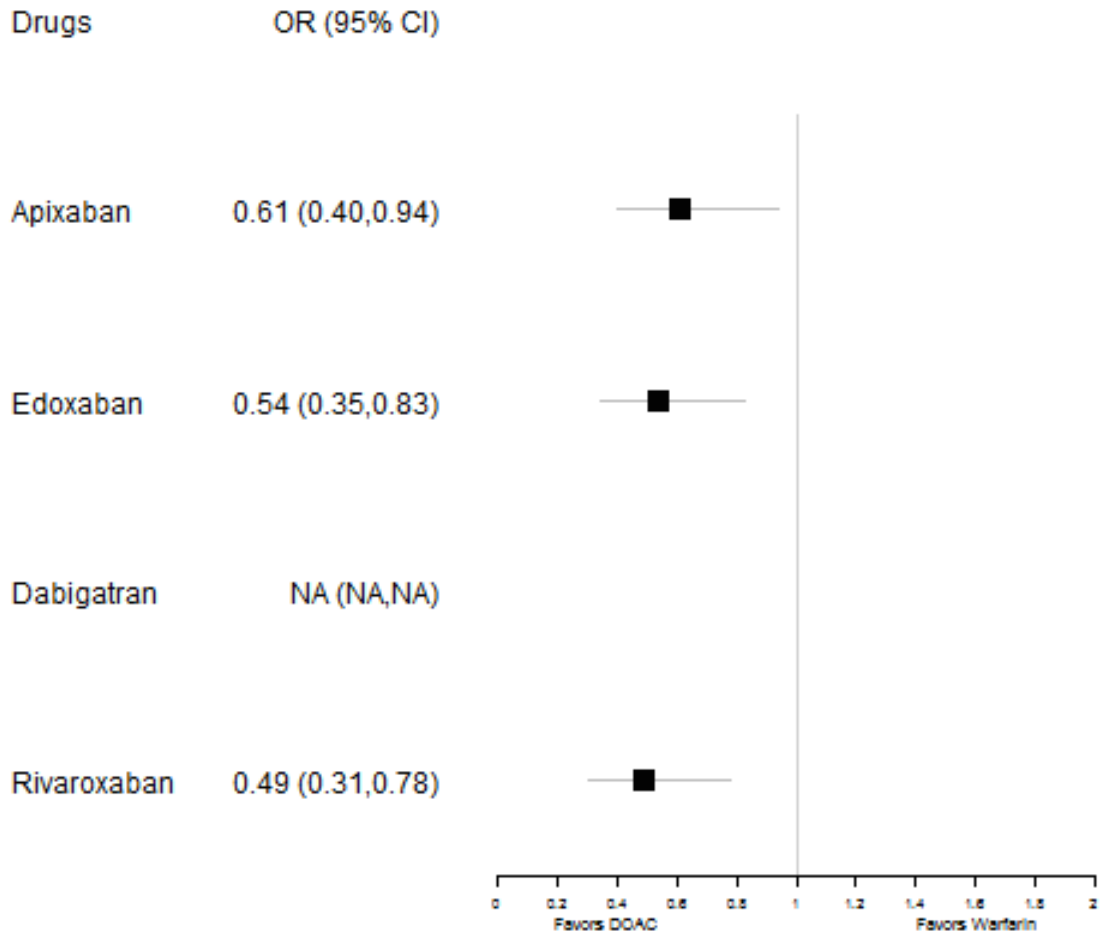

## Intracranial bleeding

Generalized linear mixed model fit by maximum likelihood (Adaptive Gauss-Hermite Quadrature, nAGQ = 7) ['glmerMod']

Family: binomial ( logit )

Formula: cbind(ADEs[, i], nADEs[, i]) ~ as.factor(arm) + as.factor(id) + (-1 + arm | id)

| AIC  | BIC  | logLik | deviance | df.resid |
|------|------|--------|----------|----------|
| 16.3 | 16.8 | -2.2   | 4.3      | 2        |

Scaled residuals:

| Min     | 1Q      | Median  | 3Q     | Max    |
|---------|---------|---------|--------|--------|
| -1.0383 | -0.5899 | -0.0324 | 0.4117 | 1.4954 |

Random effects:

| Groups | Name | Variance | Std.Dev. |
|--------|------|----------|----------|
|--------|------|----------|----------|

|    |     |   |   |
|----|-----|---|---|
| id | arm | 0 | 0 |
|----|-----|---|---|

Number of obs: 8, groups: id, 4

Fixed effects:

|                 | Estimate | Std. Error | z value | Pr(> z )     |
|-----------------|----------|------------|---------|--------------|
| (Intercept)     | -4.33169 | 0.08114    | -53.38  | < 2e-16 ***  |
| as.factor(arm)1 | -0.74160 | 0.08522    | -8.70   | < 2e-16 ***  |
| as.factor(id)2  | 0.36502  | 0.10523    | 3.47    | 0.000522 *** |
| as.factor(id)3  | 0.10006  | 0.11712    | 0.85    | 0.392905     |
| as.factor(id)4  | 0.01690  | 0.11438    | 0.15    | 0.882515     |

---

Signif. codes: 0 '\*\*\*' 0.001 '\*\*' 0.01 '\*' 0.05 '.' 0.1 ' ' 1

Correlation of Fixed Effects:

| (Intr)      | as.()1 | as.()2 | as.()3 |       |
|-------------|--------|--------|--------|-------|
| as.fctr(r)1 | -0.343 |        |        |       |
| as.fctr(d)2 | -0.680 | 0.000  |        |       |
| as.fctr(d)3 | -0.611 | -0.001 | 0.471  |       |
| as.fctr(d)4 | -0.626 | 0.001  | 0.483  | 0.434 |

### Odds Ratio of Studies for Intracranial Bleeding

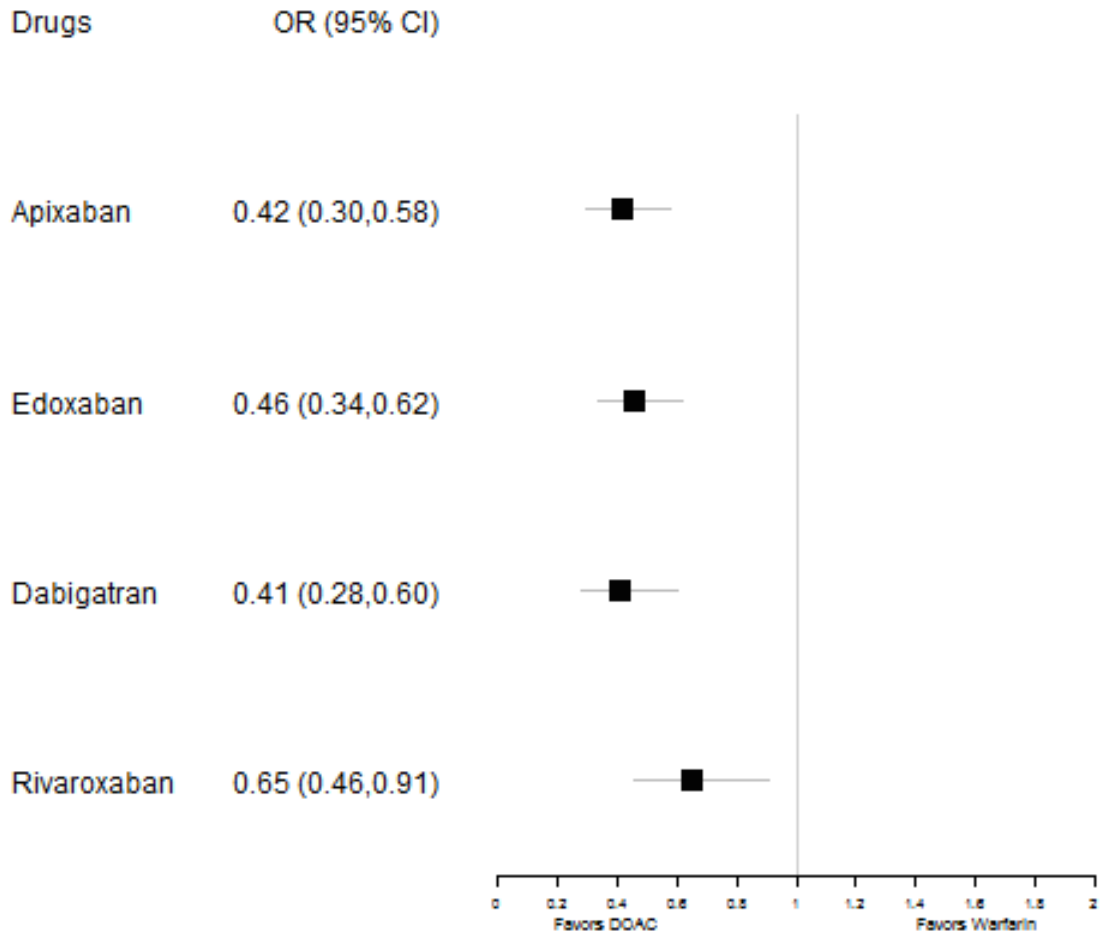

## Gastrointestinal bleeding

Generalized linear mixed model fit by maximum likelihood (Adaptive Gauss-Hermite Quadrature, nAGQ = 7) ['glmerMod']

Family: binomial (logit)

Formula: cbind(ADEs[, i], nADEs[, i]) ~ as.factor(arm) + as.factor(id) + (-1 + arm | id)

| AIC  | BIC  | logLik | deviance | df.resid |
|------|------|--------|----------|----------|
| 23.1 | 23.6 | -5.6   | 11.1     | 2        |

Scaled residuals:

| Min      | 1Q       | Median  | 3Q      | Max     |
|----------|----------|---------|---------|---------|
| -1.01639 | -0.49079 | 0.00631 | 0.42784 | 1.06326 |

Random effects:

| Groups | Name | Variance | Std.Dev. |
|--------|------|----------|----------|
|--------|------|----------|----------|

|    |     |        |        |
|----|-----|--------|--------|
| id | arm | 0.0149 | 0.1221 |
|----|-----|--------|--------|

Number of obs: 8, groups: id, 4

Fixed effects:

|                 | Estimate | Std. Error | z value | Pr(> z )     |
|-----------------|----------|------------|---------|--------------|
| (Intercept)     | -4.41646 | 0.11807    | -37.41  | < 2e-16 ***  |
| as.factor(arm)1 | 0.22908  | 0.08423    | 2.72    | 0.006535 **  |
| as.factor(id)2  | 0.83015  | 0.12798    | 6.49    | 8.79e-11 *** |
| as.factor(id)3  | 0.61827  | 0.16332    | 3.79    | 0.000153 *** |
| as.factor(id)4  | 0.64286  | 0.15787    | 4.07    | 4.66e-05 *** |

---

Signif. codes: 0 '\*\*\*' 0.001 '\*\*' 0.01 '\*' 0.05 '.' 0.1 ' ' 1

Correlation of Fixed Effects:

| (Intr)      | as.()1 | as.()2 | as.()3 |       |
|-------------|--------|--------|--------|-------|
| as.fctr(r)1 | -0.304 |        |        |       |
| as.fctr(d)2 | -0.850 | 0.129  |        |       |
| as.fctr(d)3 | -0.856 | 0.118  | 0.742  |       |
| as.fctr(d)4 | -0.871 | 0.132  | 0.753  | 0.797 |



### Odds Ratio of Studies for Gastrointestinal Bleeding

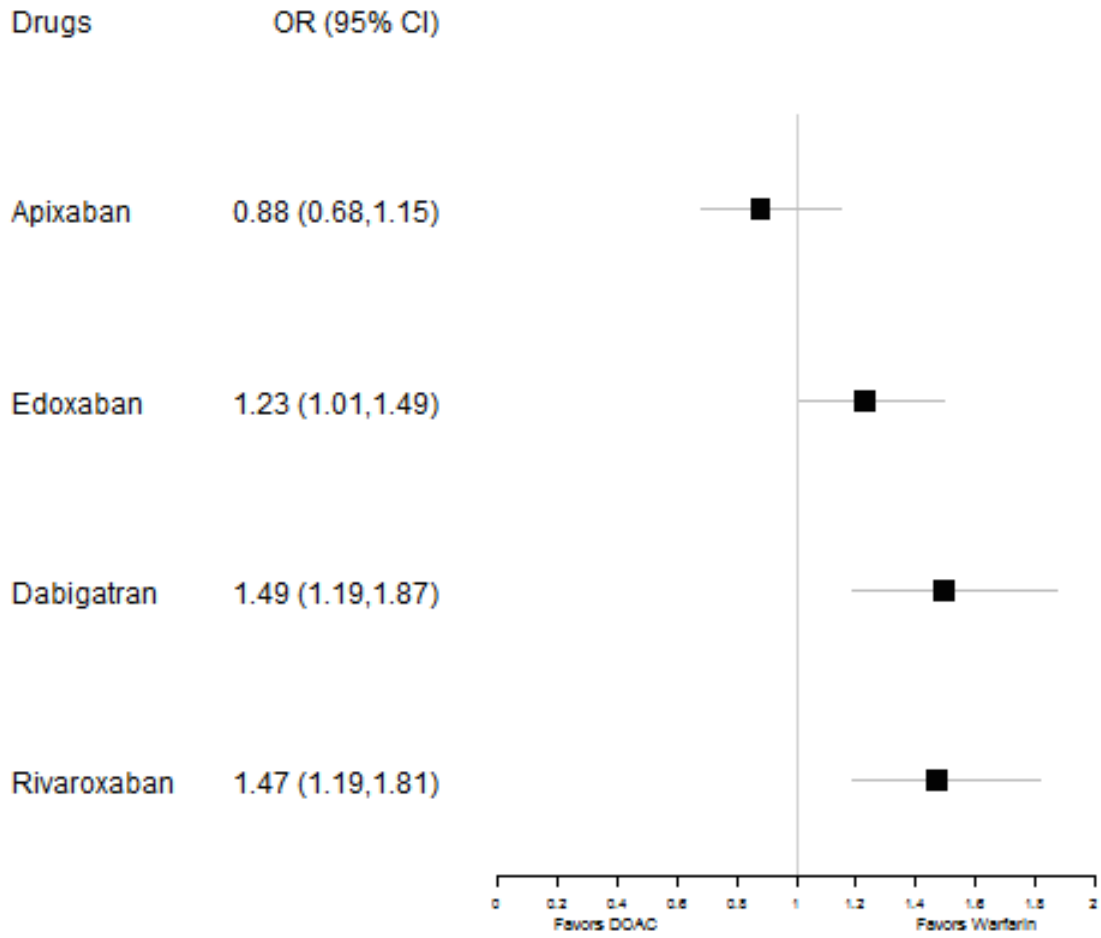

## Results of Meta-analyses: Venous thromboembolism

### Efficacy

#### Data Used

| Trial        | drug              | Sample size              | Recurrent VTE and Related Death (PO) | Death from Any Cause  | Recurrent DVT         | Fatal PE |
|--------------|-------------------|--------------------------|--------------------------------------|-----------------------|-----------------------|----------|
| AMPLIFY      | Apixaban          | 2609                     | 59                                   | 41                    | 20                    | 1        |
| EINSTEIN DVT | Rivaroxaban       | 1731                     | 36                                   | 38                    | 14                    | 1        |
| Hokusai-VTE  | Edoxaban          | 4118                     | 130                                  | 132                   | 57                    | 4        |
| RE-COVER     | Dabigatran (RCI)  | 1274                     | 30                                   | 21                    | 16                    |          |
| RECOVER II   | Dabigatran (RCII) | 1279                     | 30                                   | 25                    | 25                    |          |
| AMPLIFY      | Warfarin          | 2635                     | 71                                   | 52                    | 33                    | 2        |
| EINSTEIN DVT | Warfarin          | 1718                     | 51                                   | 49                    | 28                    | 0.5      |
| Hokusai-VTE  | Warfarin          | 4122                     | 146                                  | 126                   | 63                    | 3        |
| RE-COVER     | Warfarin          | 1265                     | 27                                   | 21                    | 18                    |          |
| RECOVER II   | Warfarin          | 1289                     | 28                                   | 25                    | 17                    |          |
|              |                   |                          |                                      |                       |                       |          |
| Trial        | drug              | Recurrent PE (Non-Fatal) | Net Clinical Benefit                 | Myocardial Infarction | All death Sample size | Miss     |
| AMPLIFY      | Apixaban          | 27                       | 73                                   | 4                     | 2676                  | 2609     |
| EINSTEIN DVT | Rivaroxaban       | 20                       | 51                                   | 5                     | 1731                  | 1731     |
| Hokusai-VTE  | Edoxaban          | 49                       | 120                                  |                       | 4118                  | 4118     |
| RE-COVER     | Dabigatran (RCI)  | 13                       |                                      | 4                     | 1274                  | 1274     |
| RECOVER II   | Dabigatran (RCII) | 7                        |                                      | 4                     | 1279                  | 1280     |
| AMPLIFY      | Warfarin          | 23                       | 118                                  | 2                     | 2689                  | 2635     |
| EINSTEIN DVT | Warfarin          | 18                       | 73                                   | 1                     | 1718                  | 1718     |
| Hokusai-VTE  | Warfarin          | 59                       | 144                                  |                       | 4122                  | 4122     |
| RE-COVER     | Warfarin          | 7                        |                                      | 2                     | 1265                  | 1265     |
| RECOVER II   | Warfarin          | 13                       |                                      | 2                     | 1289                  | 1288     |

## Recurrent VTE and related death

Generalized linear mixed model fit by maximum likelihood (Adaptive Gauss-Hermite Quadrature, nAGQ = 7) ['glmerMod']

Family: binomial ( logit )

Formula: cbind(ADEs[, i], nADEs[, i]) ~ as.factor(arm) + as.factor(id) + (-1 + arm | id)

| AIC  | BIC  | logLik | deviance | df.resid |
|------|------|--------|----------|----------|
| 16.6 | 18.7 | -1.3   | 2.6      | 3        |

Scaled residuals:

| Min     | 1Q      | Median | 3Q     | Max    |
|---------|---------|--------|--------|--------|
| -0.7858 | -0.4514 | 0.0014 | 0.4746 | 0.7425 |

Random effects:

Groups Name Variance Std.Dev.

id arm 0 0

Number of obs: 10, groups: id, 5

Fixed effects:

|                 | Estimate | Std. Error | z value | Pr(> z )    |
|-----------------|----------|------------|---------|-------------|
| (Intercept)     | -3.61083 | 0.09681    | -37.30  | < 2e-16 *** |
| as.factor(arm)1 | -0.12721 | 0.08244    | -1.54   | 0.12284     |
| as.factor(id)2  | 0.01838  | 0.14029    | 0.13    | 0.89579     |
| as.factor(id)3  | 0.31024  | 0.10788    | 2.88    | 0.00403 **  |
| as.factor(id)4  | -0.10104 | 0.16074    | -0.63   | 0.52963     |
| as.factor(id)5  | -0.09533 | 0.15978    | -0.60   | 0.55074     |

---

Signif. codes: 0 '\*\*\*' 0.001 '\*\*' 0.01 '\*' 0.05 '.' 0.1 ' ' 1

Correlation of Fixed Effects:

|             | (Intr) | as.()1 | as.()2 | as.()3 | as.()4 |
|-------------|--------|--------|--------|--------|--------|
| as.fctr(r)1 | -0.398 |        |        |        |        |
| as.fctr(d)2 | -0.580 | -0.003 |        |        |        |
| as.fctr(d)3 | -0.754 | -0.002 | 0.521  |        |        |
| as.fctr(d)4 | -0.506 | -0.002 | 0.350  | 0.455  |        |
| as.fctr(d)5 | -0.510 | 0.000  | 0.352  | 0.458  | 0.307  |

### Odds Ratio of Studies for Recurrent VTE and Related Death (PO)

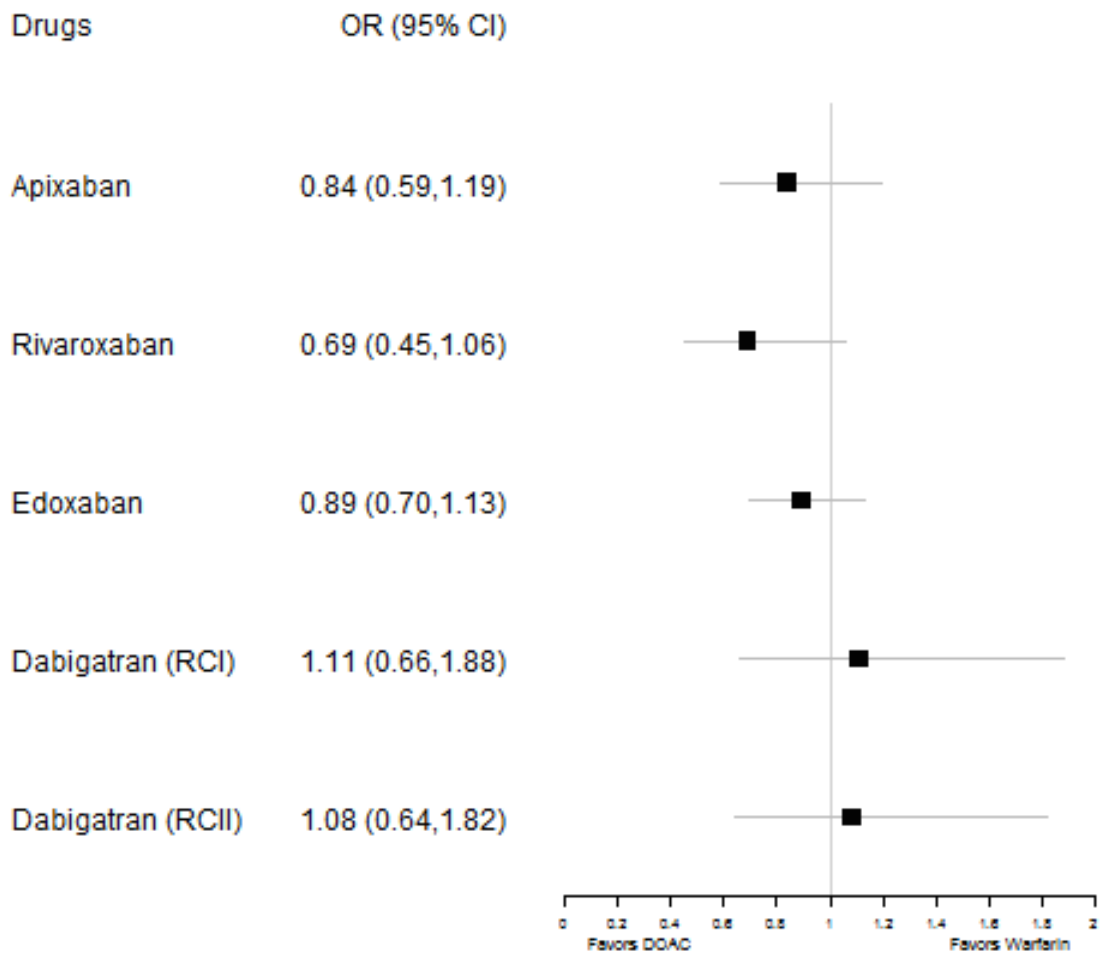

## Death from any cause

Generalized linear mixed model fit by maximum likelihood (Adaptive Gauss-Hermite Quadrature, nAGQ = 7) ['glmerMod']

Family: binomial ( logit )

Formula: cbind(ADEs[, i], nADEs[, i]) ~ as.factor(arm) + as.factor(id) + (-1 + arm | id)

| AIC  | BIC  | logLik | deviance | df.resid |
|------|------|--------|----------|----------|
| 16.5 | 18.6 | -1.2   | 2.5      | 3        |

Scaled residuals:

| Min      | 1Q       | Median  | 3Q      | Max     |
|----------|----------|---------|---------|---------|
| -0.67762 | -0.49102 | 0.00163 | 0.47825 | 0.66054 |

Random effects:

Groups Name Variance Std.Dev.

id arm 0 0

Number of obs: 10, groups: id, 5

Fixed effects:

|                 | Estimate | Std. Error | z value | Pr(> z )     |
|-----------------|----------|------------|---------|--------------|
| (Intercept)     | -4.00724 | 0.11295    | -35.48  | < 2e-16 ***  |
| as.factor(arm)1 | -0.06172 | 0.08805    | -0.70   | 0.483        |
| as.factor(id)2  | 0.38338  | 0.15078    | 2.54    | 0.011 *      |
| as.factor(id)3  | 0.60565  | 0.12225    | 4.95    | 7.25e-07 *** |
| as.factor(id)4  | -0.04743 | 0.18749    | -0.25   | 0.800        |
| as.factor(id)5  | 0.11833  | 0.17703    | 0.67    | 0.504        |

---

Signif. codes: 0 '\*\*\*' 0.001 '\*\*' 0.01 '\*' 0.05 '.' 0.1 ' ' 1

Correlation of Fixed Effects:

| (Intr)      | as.()1 | as.()2 | as.()3 | as.()4 |       |
|-------------|--------|--------|--------|--------|-------|
| as.fctr(r)1 | -0.377 |        |        |        |       |
| as.fctr(d)2 | -0.642 | -0.002 |        |        |       |
| as.fctr(d)3 | -0.792 | -0.001 | 0.594  |        |       |
| as.fctr(d)4 | -0.516 | -0.001 | 0.387  | 0.477  |       |
| as.fctr(d)5 | -0.547 | 0.000  | 0.410  | 0.506  | 0.330 |

### Odds Ratio of Studies for All Deaths

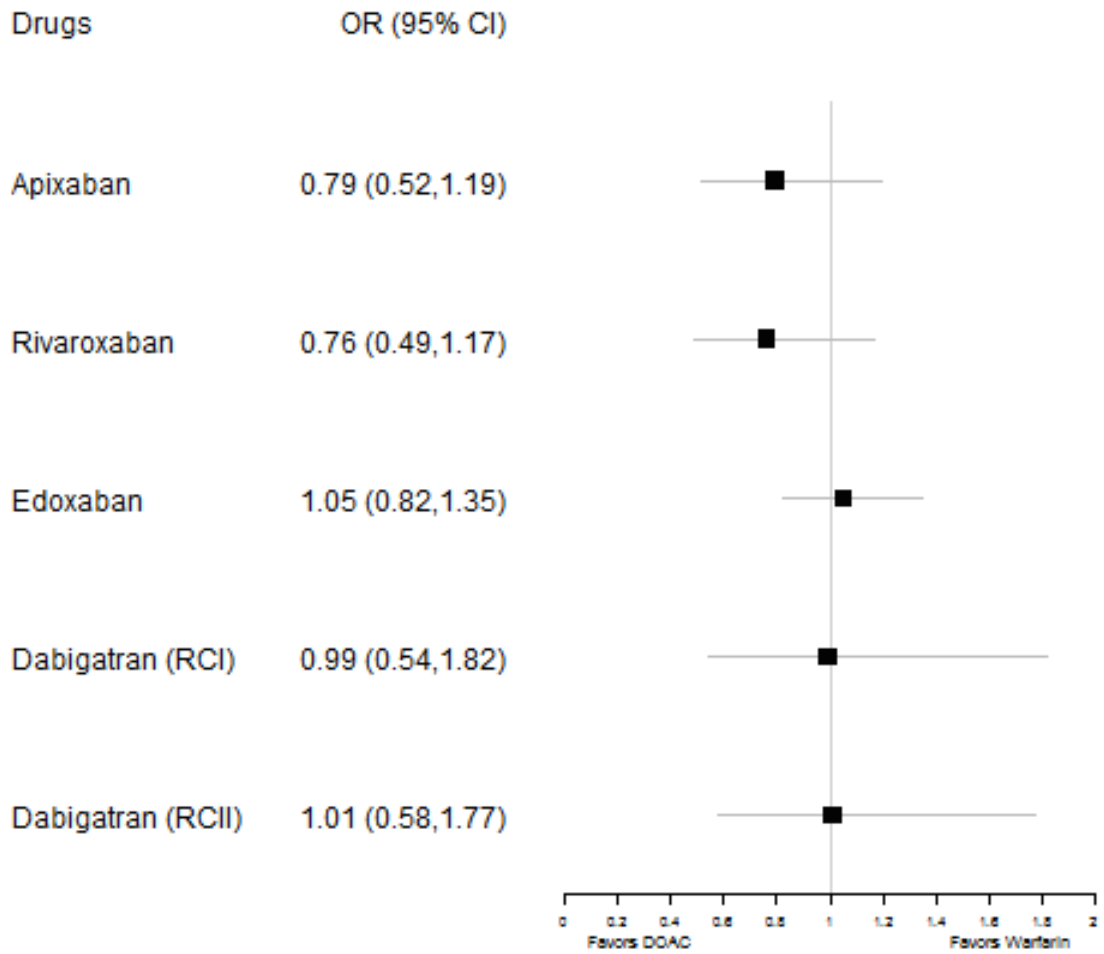

## Recurrent DVT

Generalized linear mixed model fit by maximum likelihood (Adaptive Gauss-Hermite Quadrature, nAGQ = 7) ['glmerMod']

Family: binomial ( logit )

Formula: cbind(ADEs[, i], nADEs[, i]) ~ as.factor(arm) + as.factor(id) + (-1 + arm | id)

| AIC  | BIC  | logLik | deviance | df.resid |
|------|------|--------|----------|----------|
| 21.6 | 23.7 | -3.8   | 7.6      | 3        |

Scaled residuals:

| Min      | 1Q       | Median  | 3Q      | Max     |
|----------|----------|---------|---------|---------|
| -1.26411 | -0.68339 | 0.00542 | 0.63531 | 1.38932 |

Random effects:

| Groups | Name | Variance | Std.Dev. |
|--------|------|----------|----------|
|--------|------|----------|----------|

|    |     |           |           |
|----|-----|-----------|-----------|
| id | arm | 2.463e-18 | 1.569e-09 |
|----|-----|-----------|-----------|

Number of obs: 10, groups: id, 5

Fixed effects:

|                 | Estimate | Std. Error | z value | Pr(> z )   |
|-----------------|----------|------------|---------|------------|
| (Intercept)     | -4.4955  | 0.1481     | -30.356 | <2e-16 *** |
| as.factor(arm)1 | -0.1872  | 0.1185     | -1.579  | 0.1143     |
| as.factor(id)2  | 0.1893   | 0.2078     | 0.911   | 0.3622     |
| as.factor(id)3  | 0.3703   | 0.1659     | 2.232   | 0.0256 *   |
| as.factor(id)4  | 0.2855   | 0.2211     | 1.292   | 0.1965     |
| as.factor(id)5  | 0.4878   | 0.2080     | 2.345   | 0.0190 *   |

---

Signif. codes: 0 '\*\*\*' 0.001 '\*\*' 0.01 '\*' 0.05 '.' 0.1 ' ' 1

Correlation of Fixed Effects:

| (Intr)      | as.()1 | as.()2 | as.()3 | as.()4 |       |
|-------------|--------|--------|--------|--------|-------|
| as.fctr(r)1 | -0.362 |        |        |        |       |
| as.fctr(d)2 | -0.619 | -0.003 |        |        |       |
| as.fctr(d)3 | -0.775 | -0.002 | 0.553  |        |       |
| as.fctr(d)4 | -0.581 | -0.002 | 0.415  | 0.520  |       |
| as.fctr(d)5 | -0.619 | -0.001 | 0.441  | 0.552  | 0.415 |

### Odds Ratio of Studies for Recurrent DVT

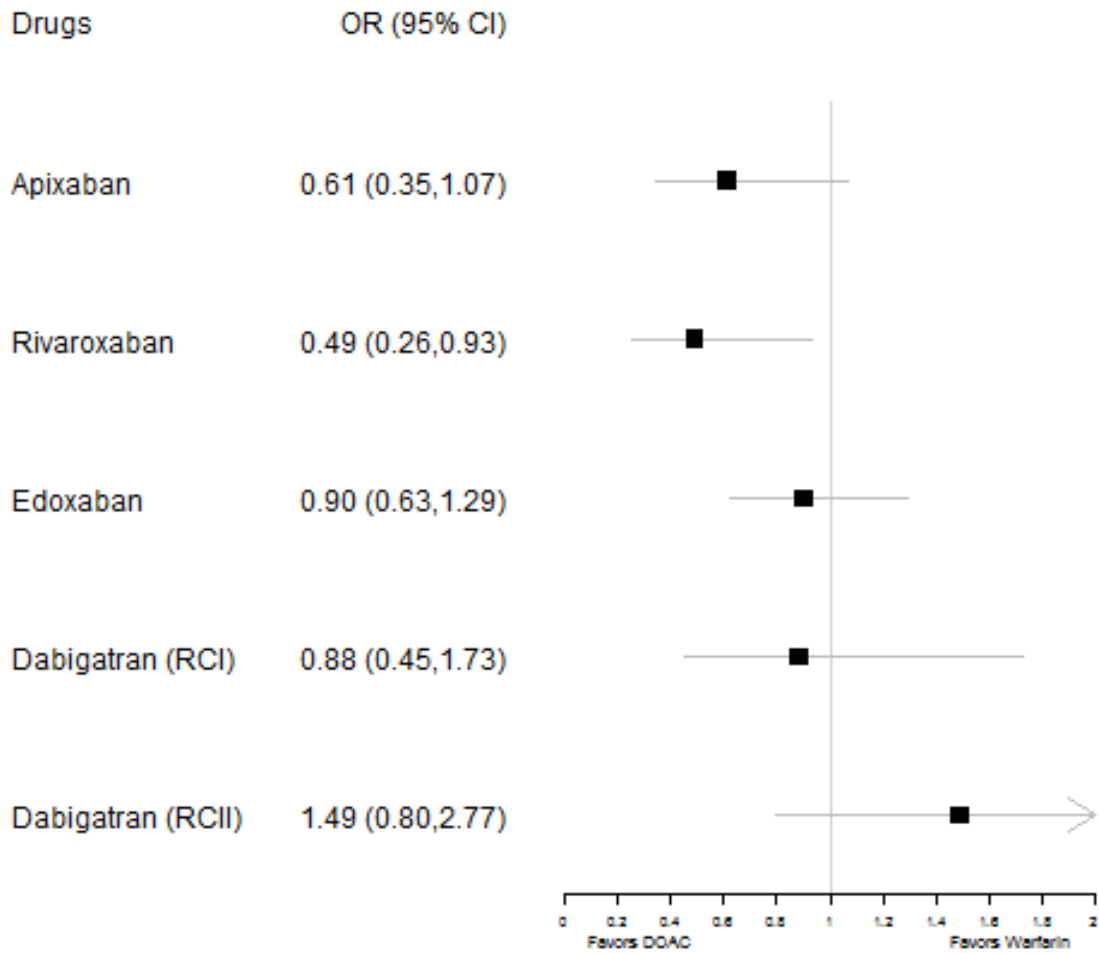



## Fatal PE

Generalized linear mixed model fit by maximum likelihood (Adaptive Gauss-Hermite Quadrature, nAGQ = 7) ['glmerMod']

Family: binomial ( logit )

Formula: cbind(ADEs[, i], nADEs[, i]) ~ as.factor(arm) + as.factor(id) + (-1 + arm | id)

| AIC  | BIC  | logLik | deviance | df.resid |
|------|------|--------|----------|----------|
| 11.8 | 10.7 | -0.9   | 1.8      | 1        |

Scaled residuals:

| Min      | 1Q       | Median   | 3Q      | Max     |
|----------|----------|----------|---------|---------|
| -0.67240 | -0.39577 | -0.00441 | 0.42745 | 0.61069 |

Random effects:

| Groups | Name | Variance | Std.Dev. |
|--------|------|----------|----------|
|--------|------|----------|----------|

|    |     |   |   |
|----|-----|---|---|
| id | arm | 0 | 0 |
|----|-----|---|---|

Number of obs: 6, groups: id, 3

Fixed effects:

|                 | Estimate | Std. Error | z value | Pr(> z )   |
|-----------------|----------|------------|---------|------------|
| (Intercept)     | -7.5620  | 0.6648     | -11.375 | <2e-16 *** |
| as.factor(arm)1 | 0.1851   | 0.6057     | 0.306   | 0.760      |
| as.factor(id)2  | -0.6807  | 1.1549     | -0.589  | 0.556      |
| as.factor(id)3  | 0.3952   | 0.6903     | 0.573   | 0.567      |

---

Signif. codes: 0 '\*\*\*' 0.001 '\*\*' 0.01 '\*' 0.05 '.' 0.1 ' ' 1

Correlation of Fixed Effects:

|             | (Intr) | as.()1 | as.()2 |
|-------------|--------|--------|--------|
| as.fctr(r)1 | -0.495 |        |        |
| as.fctr(d)2 | -0.433 | -0.002 |        |
| as.fctr(d)3 | -0.726 | -0.002 | 0.418  |

### Odds Ratio of Studies for Fatal PE

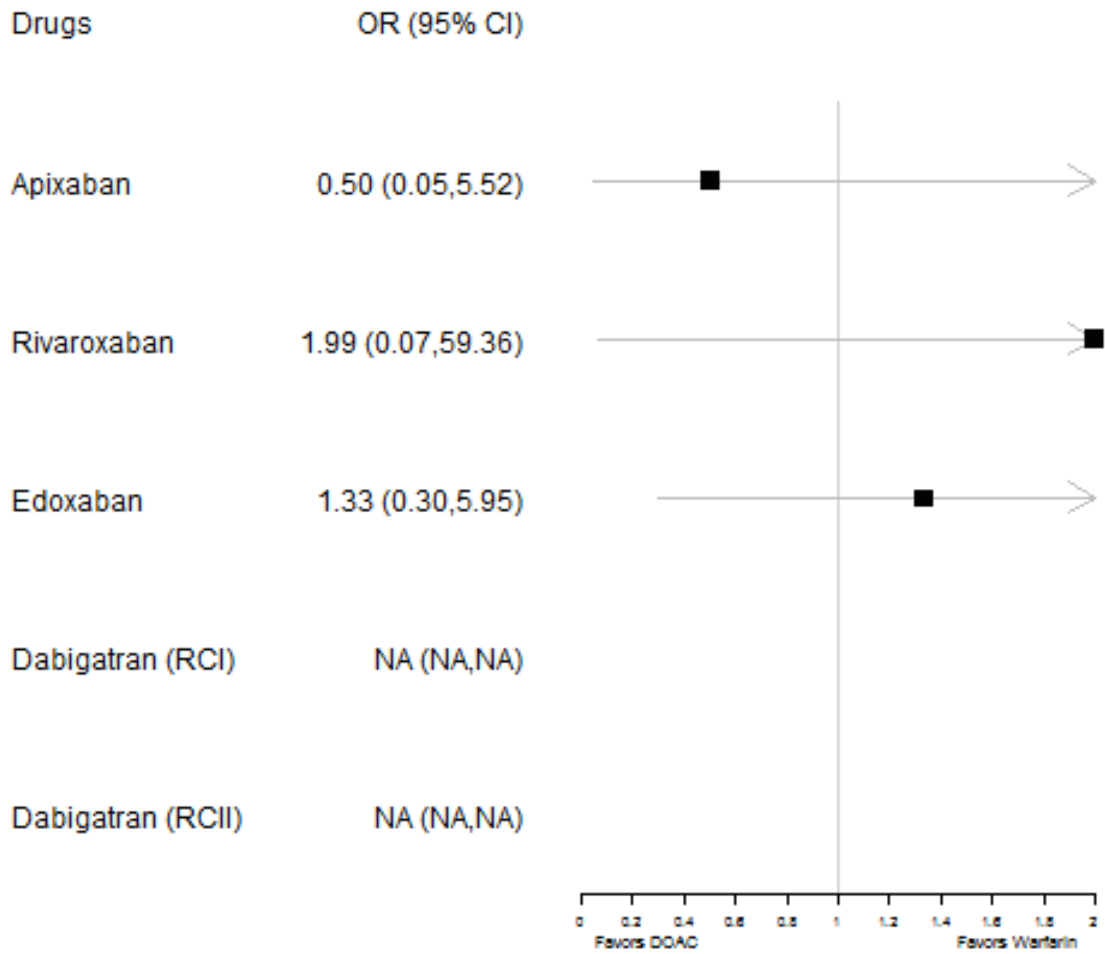

## Recurrent PE (non-fatal)

Generalized linear mixed model fit by maximum likelihood (Adaptive Gauss-Hermite Quadrature, nAGQ = 7) ['glmerMod']

Family: binomial ( logit )

Formula: cbind(ADEs[, i], nADEs[, i]) ~ as.factor(arm) + as.factor(id) + (-1 + arm | id)

| AIC  | BIC  | logLik | deviance | df.resid |
|------|------|--------|----------|----------|
| 18.9 | 21.0 | -2.5   | 4.9      | 3        |

Scaled residuals:

| Min      | 1Q       | Median  | 3Q      | Max     |
|----------|----------|---------|---------|---------|
| -0.98675 | -0.55035 | 0.00176 | 0.54609 | 0.99930 |

Random effects:

Groups Name Variance Std.Dev.

id arm 0 0

Number of obs: 10, groups: id, 5

Fixed effects:

|                 | Estimate | Std. Error | z value | Pr(> z )   |
|-----------------|----------|------------|---------|------------|
| (Intercept)     | -4.62701 | 0.15588    | -29.682 | <2e-16 *** |
| as.factor(arm)1 | -0.03288 | 0.13094    | -0.251  | 0.8017     |
| as.factor(id)2  | 0.14621  | 0.21634    | 0.676   | 0.4992     |
| as.factor(id)3  | 0.32188  | 0.17197    | 1.872   | 0.0613 .   |
| as.factor(id)4  | -0.19251 | 0.26569    | -0.725  | 0.4687     |
| as.factor(id)5  | -0.20408 | 0.26568    | -0.768  | 0.4424     |

---

Signif. codes: 0 '\*\*\*' 0.001 '\*\*' 0.01 '\*' 0.05 '.' 0.1 ' ' 1

Correlation of Fixed Effects:

| (Intr)      | as.()1 | as.()2 | as.()3 | as.()4 |       |
|-------------|--------|--------|--------|--------|-------|
| as.fctr(r)1 | -0.411 |        |        |        |       |
| as.fctr(d)2 | -0.598 | -0.003 |        |        |       |
| as.fctr(d)3 | -0.753 | -0.002 | 0.543  |        |       |
| as.fctr(d)4 | -0.487 | -0.002 | 0.351  | 0.442  |       |
| as.fctr(d)5 | -0.487 | 0.000  | 0.351  | 0.442  | 0.286 |

### Odds Ratio of Studies for Recurrent PE (Non Fatal)

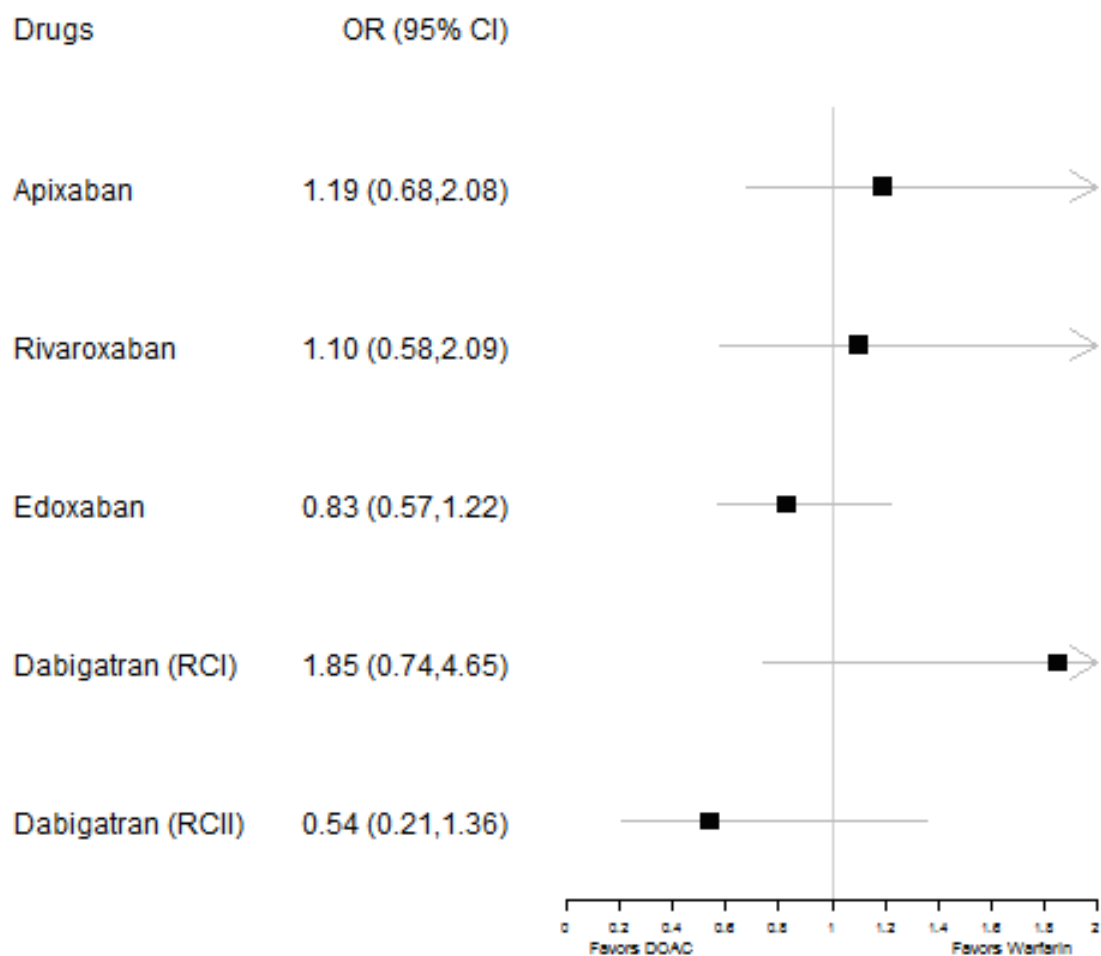

## Net clinical benefit

Generalized linear mixed model fit by maximum likelihood (Adaptive Gauss-Hermite Quadrature, nAGQ = 7) ['glmerMod']

Family: binomial ( logit )

Formula: cbind(ADEs[, i], nADEs[, i]) ~ as.factor(arm) + as.factor(id) + (-1 + arm | id)

| AIC  | BIC  | logLik | deviance | df.resid |
|------|------|--------|----------|----------|
| 12.4 | 11.4 | -1.2   | 2.4      | 1        |

Scaled residuals:

| Min      | 1Q       | Median   | 3Q      | Max     |
|----------|----------|----------|---------|---------|
| -0.81205 | -0.59411 | -0.01502 | 0.56822 | 0.83814 |

Random effects:

| Groups | Name | Variance | Std.Dev. |
|--------|------|----------|----------|
|--------|------|----------|----------|

|    |     |   |   |
|----|-----|---|---|
| id | arm | 0 | 0 |
|----|-----|---|---|

Number of obs: 6, groups: id, 3

Fixed effects:

|                 | Estimate | Std. Error | z value | Pr(> z )    |
|-----------------|----------|------------|---------|-------------|
| (Intercept)     | -3.12556 | 0.08214    | -38.05  | < 2e-16 *** |
| as.factor(arm)1 | -0.32596 | 0.08561    | -3.81   | 0.00014 *** |
| as.factor(id)2  | -0.01208 | 0.11752    | -0.10   | 0.91813     |
| as.factor(id)3  | -0.13217 | 0.09672    | -1.37   | 0.17178     |

---

Signif. codes: 0 '\*\*\*' 0.001 '\*\*' 0.01 '\*' 0.05 '.' 0.1 ' ' 1

Correlation of Fixed Effects:

|             | (Intr) | as.()1 | as.()2 |
|-------------|--------|--------|--------|
| as.fctr(r)1 | -0.440 |        |        |
| as.fctr(d)2 | -0.562 | -0.003 |        |
| as.fctr(d)3 | -0.684 | -0.001 | 0.478  |

### Odds Ratio of Studies for Net Clinical Benefit

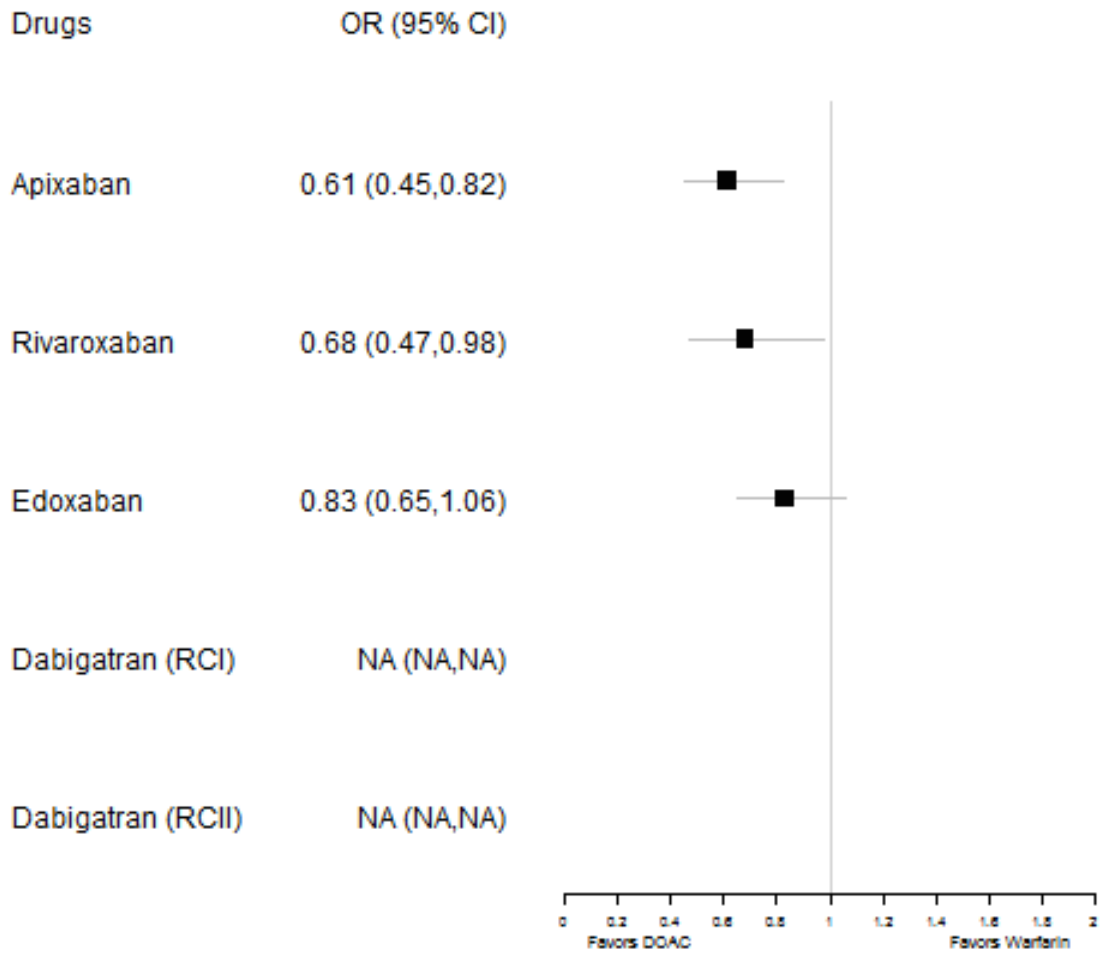

## Myocardial infarction

Generalized linear mixed model fit by maximum likelihood (Adaptive Gauss-Hermite Quadrature, nAGQ = 7) ['glmerMod']

Family: binomial ( logit )

Formula: cbind(ADEs[, i], nADEs[, i]) ~ as.factor(arm) + as.factor(id) + (-1 + arm | id)

| AIC  | BIC  | logLik | deviance | df.resid |
|------|------|--------|----------|----------|
| 12.6 | 13.1 | -0.3   | 0.6      | 2        |

Scaled residuals:

| Min      | 1Q       | Median  | 3Q      | Max     |
|----------|----------|---------|---------|---------|
| -0.56129 | -0.11978 | 0.03198 | 0.18622 | 0.35898 |

Random effects:

| Groups | Name | Variance | Std.Dev. |
|--------|------|----------|----------|
|--------|------|----------|----------|

|    |     |   |   |
|----|-----|---|---|
| id | arm | 0 | 0 |
|----|-----|---|---|

Number of obs: 8, groups: id, 4

Fixed effects:

|                 | Estimate | Std. Error | z value | Pr(> z )   |
|-----------------|----------|------------|---------|------------|
| (Intercept)     | -7.3101  | 0.5174     | -14.130 | <2e-16 *** |
| as.factor(arm)1 | 0.8893   | 0.4494     | 1.979   | 0.0479 *   |
| as.factor(id)2  | 0.4161   | 0.5778     | 0.720   | 0.4715     |
| as.factor(id)4  | 0.7232   | 0.5779     | 1.251   | 0.2108     |
| as.factor(id)5  | 0.7146   | 0.5779     | 1.236   | 0.2163     |

---

Signif. codes: 0 '\*\*\*' 0.001 '\*\*' 0.01 '\*' 0.05 '.' 0.1 ' ' 1

Correlation of Fixed Effects:

| (Intr)      | as.()1 | as.()2 | as.()4 |       |
|-------------|--------|--------|--------|-------|
| as.fctr(r)1 | -0.614 |        |        |       |
| as.fctr(d)2 | -0.557 | -0.003 |        |       |
| as.fctr(d)4 | -0.557 | -0.002 | 0.500  |       |
| as.fctr(d)5 | -0.558 | 0.000  | 0.500  | 0.500 |

### Odds Ratio of Studies for Myocardial Infarction

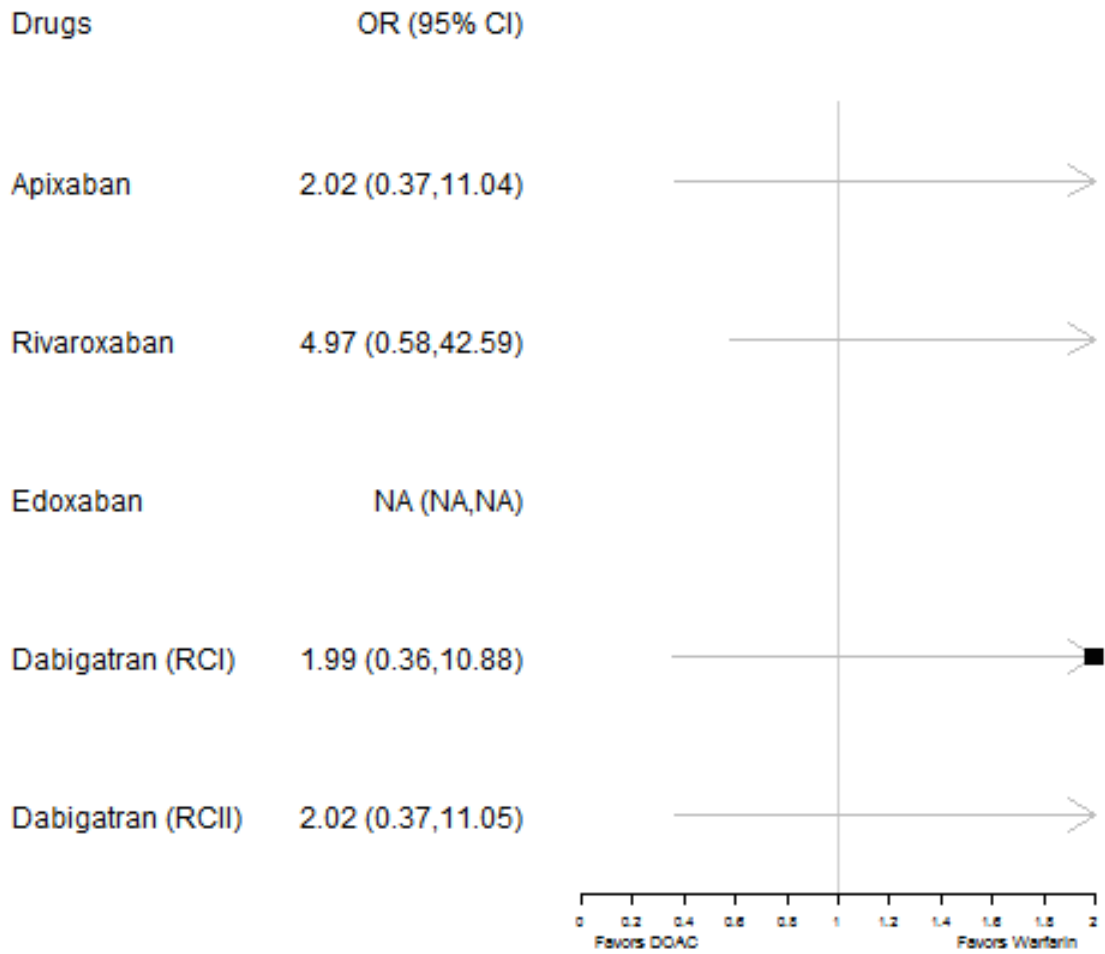



# Safety

## Data Used

| STUDY        | Drug                               | Sample Size            | All-cause Mortality         | Major Bleeding        | Fatal Bleeding           | Intracranial Bleeding           | Gastrointestinal Bleeding          |
|--------------|------------------------------------|------------------------|-----------------------------|-----------------------|--------------------------|---------------------------------|------------------------------------|
| RE-COVER     | Dabigatran (RCI)                   | 1273                   | 21                          | 20                    | 1                        | 0                               | 53                                 |
| RE-COVER2    | Dabigatran (RCII)                  | 1280                   | 25                          | 15                    | 0                        | 2                               | 48                                 |
| EINSTEIN-DVT | Rivaroxaban                        | 1718                   | 38                          | 14                    | 1                        |                                 |                                    |
| AMPLIFY      | Apixaban                           | 2676                   | 41                          | 15                    | 1                        | 3                               | 7                                  |
| Hokusai-VTE  | Edoxaban                           | 4118                   | 132                         | 56                    | 2                        | 5                               |                                    |
| RE-COVER     | Warfarin                           | 1266                   | 21                          | 24                    | 1                        | 3                               | 35                                 |
| RE-COVER2    | Warfarin                           | 1288                   | 25                          | 22                    | 1                        | 2                               | 33                                 |
| EINSTEIN-DVT | Enoxaparin, Warfarin/acenocoumarol | 1711                   | 49                          | 20                    | 5                        |                                 |                                    |
| AMPLIFY      | Enoxaparin, Warfarin               | 2689                   | 52                          | 49                    | 2                        | 6                               | 18                                 |
| Hokusai-VTE  | LMWH Warfarin                      | 4122                   | 126                         | 66                    | 10                       | 18                              |                                    |
|              |                                    |                        |                             |                       |                          |                                 |                                    |
| STUDY        | Drug                               | ALT greater than 3xULN | Non-major Relevant Bleeding | Serious Adverse Event | Medication Stopped (ADE) | All-cause Mortality Denominator | ALT greater than 3xULN Denominator |
| RE-COVER     | Dabigatran (RCI)                   | 42                     |                             | 165                   | 126                      | 1273                            | 1220                               |
| RE-COVER2    | Dabigatran (RCII)                  |                        |                             | 156                   | 102                      | 1280                            |                                    |
| EINSTEIN-DVT | Rivaroxaban                        | 25                     | 126                         | 201                   | 85                       | 1718                            | 1680                               |
| AMPLIFY      | Apixaban                           | 50                     | 103                         | 417                   | 150                      | 2676                            | 2601                               |
| Hokusai-VTE  | Edoxaban                           | 81                     | 298                         | 503                   | 41                       | 4118                            | 3901                               |
| RE-COVER     | Warfarin                           | 46                     |                             | 150                   | 102                      | 1266                            | 1199                               |
| RE-COVER2    | Warfarin                           |                        |                             | 153                   | 101                      | 1288                            |                                    |
| EINSTEIN-DVT | Enoxaparin, Warfarin/acenocoumarol | 62                     | 119                         | 233                   | 81                       | 1711                            | 1649                               |
| AMPLIFY      | Enoxaparin, Warfarin               | 145                    | 215                         | 410                   | 182                      | 2689                            | 2598                               |
| Hokusai-VTE  | LMWH Warfarin                      | 90                     | 368                         | 544                   | 51                       | 4122                            | 3903                               |

## Major bleeding

Generalized linear mixed model fit by maximum likelihood (Adaptive Gauss-Hermite Quadrature, nAGQ = 7) ['glmerMod']

Family: binomial ( logit )

Formula: cbind(ADEs[, i], nADEs[, i]) ~ as.factor(arm) + as.factor(id) + (-1 + arm | id)

| AIC  | BIC  | logLik | deviance | df.resid |
|------|------|--------|----------|----------|
| 23.4 | 25.5 | -4.7   | 9.4      | 3        |

Scaled residuals:

| Min      | 1Q       | Median  | 3Q      | Max     |
|----------|----------|---------|---------|---------|
| -1.31368 | -0.29020 | 0.02406 | 0.37533 | 0.94190 |

Random effects:

| Groups | Name | Variance | Std.Dev. |
|--------|------|----------|----------|
|--------|------|----------|----------|

|    |     |         |       |
|----|-----|---------|-------|
| id | arm | 0.04453 | 0.211 |
|----|-----|---------|-------|

Number of obs: 10, groups: id, 5

Fixed effects:

|                 | Estimate | Std. Error | z value | Pr(> z )    |
|-----------------|----------|------------|---------|-------------|
| (Intercept)     | -3.8733  | 0.1771     | -21.867 | < 2e-16 *** |
| as.factor(arm)1 | -0.4505  | 0.1591     | -2.832  | 0.00463 **  |
| as.factor(id)2  | -0.1633  | 0.2485     | -0.657  | 0.51101     |
| as.factor(id)3  | -0.5424  | 0.2532     | -2.142  | 0.03217 *   |
| as.factor(id)4  | -0.2491  | 0.2511     | -0.992  | 0.32126     |
| as.factor(id)5  | -0.1916  | 0.2017     | -0.950  | 0.34199     |

---

Signif. codes: 0 '\*\*\*' 0.001 '\*\*' 0.01 '\*' 0.05 '.' 0.1 ' ' 1

Correlation of Fixed Effects:

| (Intr)      | as.()1 | as.()2 | as.()3 | as.()4 |       |
|-------------|--------|--------|--------|--------|-------|
| as.fctr(r)1 | -0.216 |        |        |        |       |
| as.fctr(d)2 | -0.665 | -0.021 |        |        |       |
| as.fctr(d)3 | -0.650 | -0.024 | 0.463  |        |       |
| as.fctr(d)4 | -0.740 | -0.035 | 0.512  | 0.498  |       |
| as.fctr(d)5 | -0.804 | 0.083  | 0.560  | 0.550  | 0.536 |

### Odds Ratio of Studies for Major Bleeding

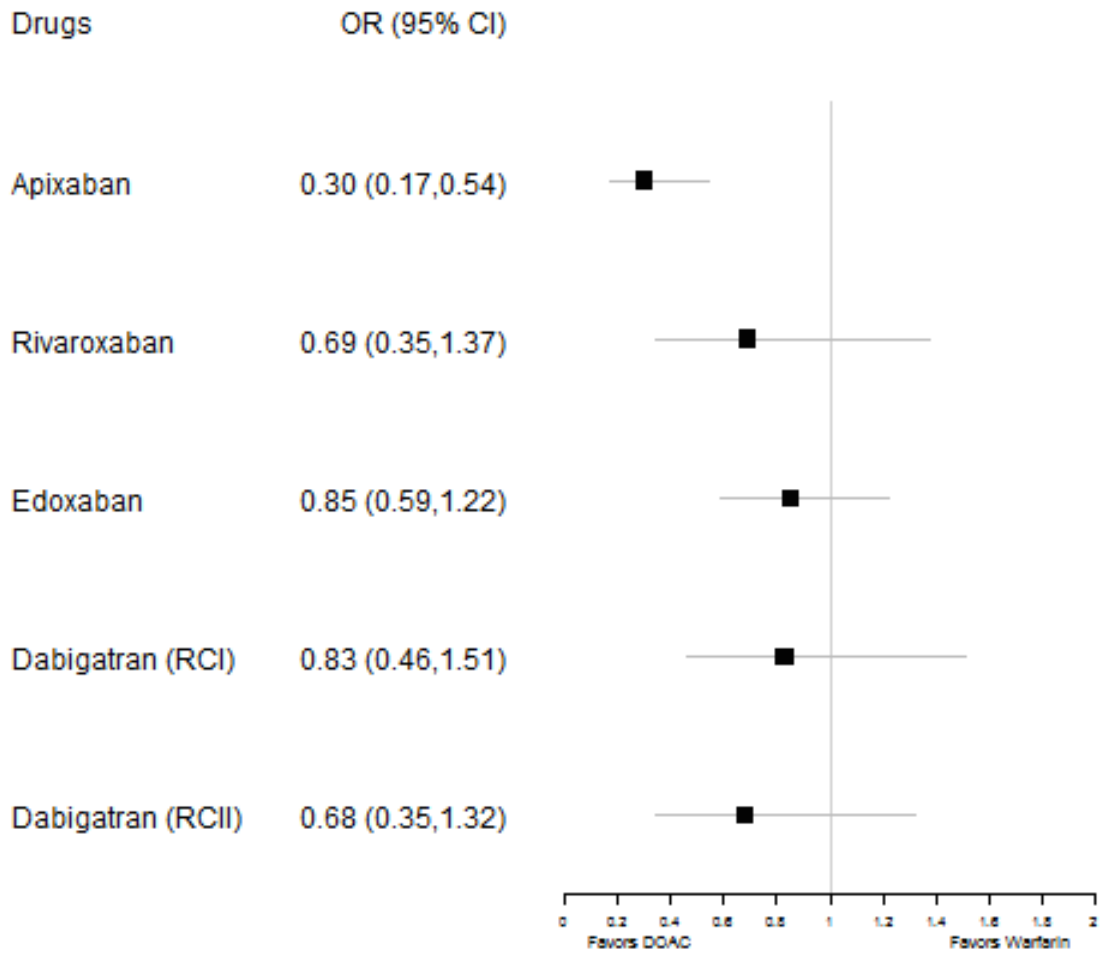

## Fatal bleeding

Generalized linear mixed model fit by maximum likelihood (Adaptive Gauss-Hermite Quadrature, nAGQ = 7) ['glmerMod']

Family: binomial ( logit )

Formula: cbind(ADEs[, i], nADEs[, i]) ~ as.factor(arm) + as.factor(id) + (-1 + arm | id)

| AIC  | BIC  | logLik | deviance | df.resid |
|------|------|--------|----------|----------|
| 15.4 | 17.5 | -0.7   | 1.4      | 3        |

Scaled residuals:

| Min      | 1Q       | Median  | 3Q      | Max     |
|----------|----------|---------|---------|---------|
| -0.44158 | -0.28097 | 0.00517 | 0.27078 | 0.81836 |

Random effects:

| Groups | Name | Variance | Std.Dev. |
|--------|------|----------|----------|
|--------|------|----------|----------|

|    |     |   |   |
|----|-----|---|---|
| id | arm | 0 | 0 |
|----|-----|---|---|

Number of obs: 10, groups: id, 5

Fixed effects:

|                 | Estimate | Std. Error | z value | Pr(> z )   |
|-----------------|----------|------------|---------|------------|
| (Intercept)     | -6.7046  | 0.7158     | -9.366  | <2e-16 *** |
| as.factor(arm)1 | -1.2411  | 0.4844     | -2.562  | 0.0104 *   |
| as.factor(id)2  | -0.3025  | 1.0806     | -0.280  | 0.7795     |
| as.factor(id)3  | 0.7990   | 0.8170     | 0.978   | 0.3281     |
| as.factor(id)4  | -0.3458  | 0.9132     | -0.379  | 0.7049     |
| as.factor(id)5  | 0.6136   | 0.7642     | 0.803   | 0.4220     |

---

Signif. codes: 0 '\*\*\*' 0.001 '\*\*' 0.01 '\*' 0.05 '.' 0.1 ' ' 1

Correlation of Fixed Effects:

| (Intr)      | as.()1 | as.()2 | as.()3 | as.()4 |       |
|-------------|--------|--------|--------|--------|-------|
| as.fctr(r)1 | -0.153 |        |        |        |       |
| as.fctr(d)2 | -0.647 | 0.001  |        |        |       |
| as.fctr(d)3 | -0.856 | 0.000  | 0.567  |        |       |
| as.fctr(d)4 | -0.766 | 0.001  | 0.507  | 0.671  |       |
| as.fctr(d)5 | -0.915 | 0.001  | 0.606  | 0.802  | 0.717 |

### Odds Ratio of Studies for Fatal Bleeding

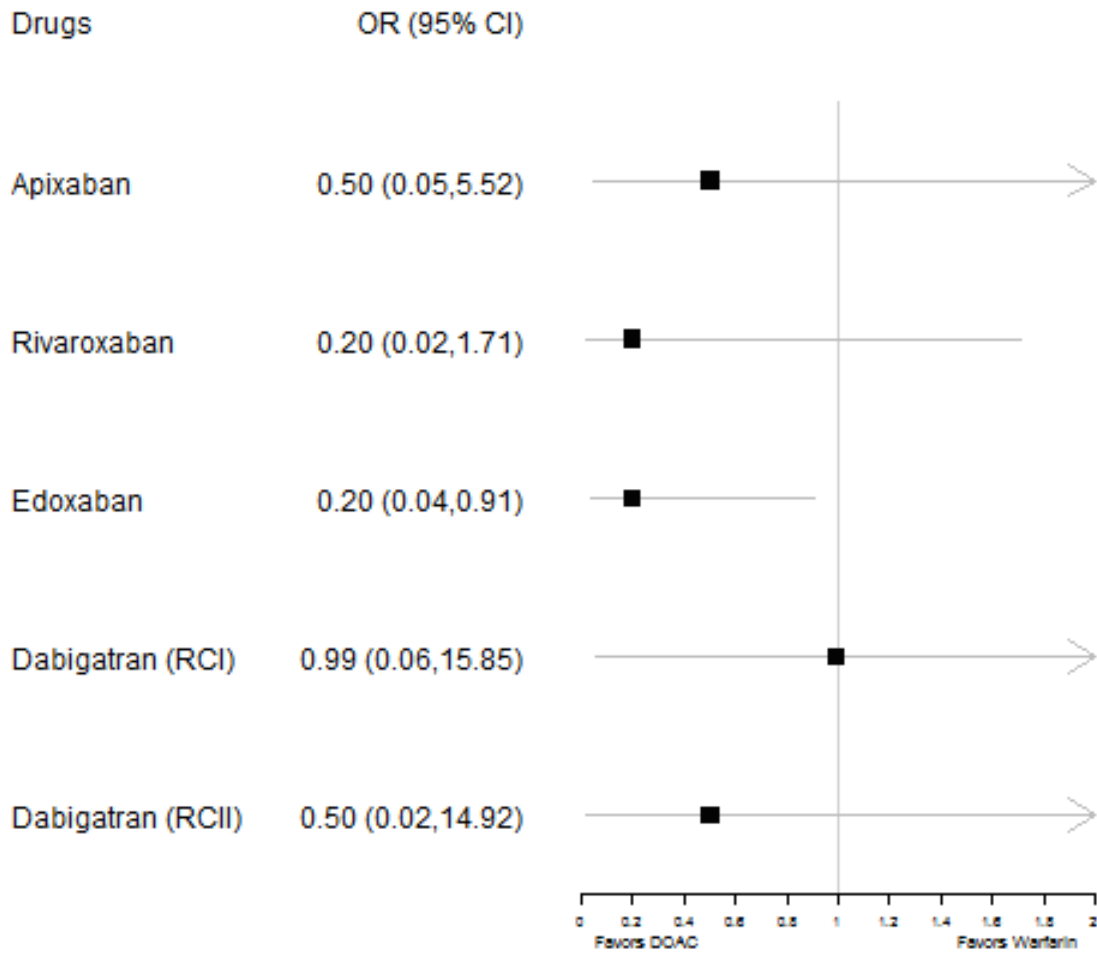

## Intracranial bleeding

Generalized linear mixed model fit by maximum likelihood (Adaptive Gauss-Hermite Quadrature, nAGQ = 7) ['glmerMod']

Family: binomial ( logit )

Formula: cbind(ADEs[, i], nADEs[, i]) ~ as.factor(arm) + as.factor(id) + (-1 + arm | id)

| AIC  | BIC  | logLik | deviance | df.resid |
|------|------|--------|----------|----------|
| 13.8 | 14.3 | -0.9   | 1.8      | 2        |

Scaled residuals:

| Min      | 1Q       | Median  | 3Q      | Max     |
|----------|----------|---------|---------|---------|
| -0.54918 | -0.45066 | 0.01637 | 0.30424 | 0.91436 |

Random effects:

| Groups | Name | Variance | Std.Dev. |
|--------|------|----------|----------|
|--------|------|----------|----------|

|    |     |   |   |
|----|-----|---|---|
| id | arm | 0 | 0 |
|----|-----|---|---|

Number of obs: 8, groups: id, 4

Fixed effects:

|                 | Estimate | Std. Error | z value | Pr(> z )    |
|-----------------|----------|------------|---------|-------------|
| (Intercept)     | -6.1996  | 0.5436     | -11.405 | < 2e-16 *** |
| as.factor(arm)1 | -1.0163  | 0.3605     | -2.819  | 0.00482 **  |
| as.factor(id)2  | 0.1196   | 0.7326     | 0.163   | 0.87027     |
| as.factor(id)4  | 0.1943   | 0.6305     | 0.308   | 0.75799     |
| as.factor(id)5  | 0.7057   | 0.5743     | 1.229   | 0.21914     |

---

Signif. codes: 0 '\*\*\*' 0.001 '\*\*' 0.01 '\*' 0.05 '.' 0.1 ' ' 1

Correlation of Fixed Effects:

| (Intr)      | as.()1 | as.()2 | as.()4 |       |
|-------------|--------|--------|--------|-------|
| as.fctr(r)1 | -0.177 |        |        |       |
| as.fctr(d)2 | -0.719 | 0.001  |        |       |
| as.fctr(d)4 | -0.835 | 0.001  | 0.620  |       |
| as.fctr(d)5 | -0.917 | 0.000  | 0.680  | 0.790 |

### Odds Ratio of Studies for Intracranial Bleeding

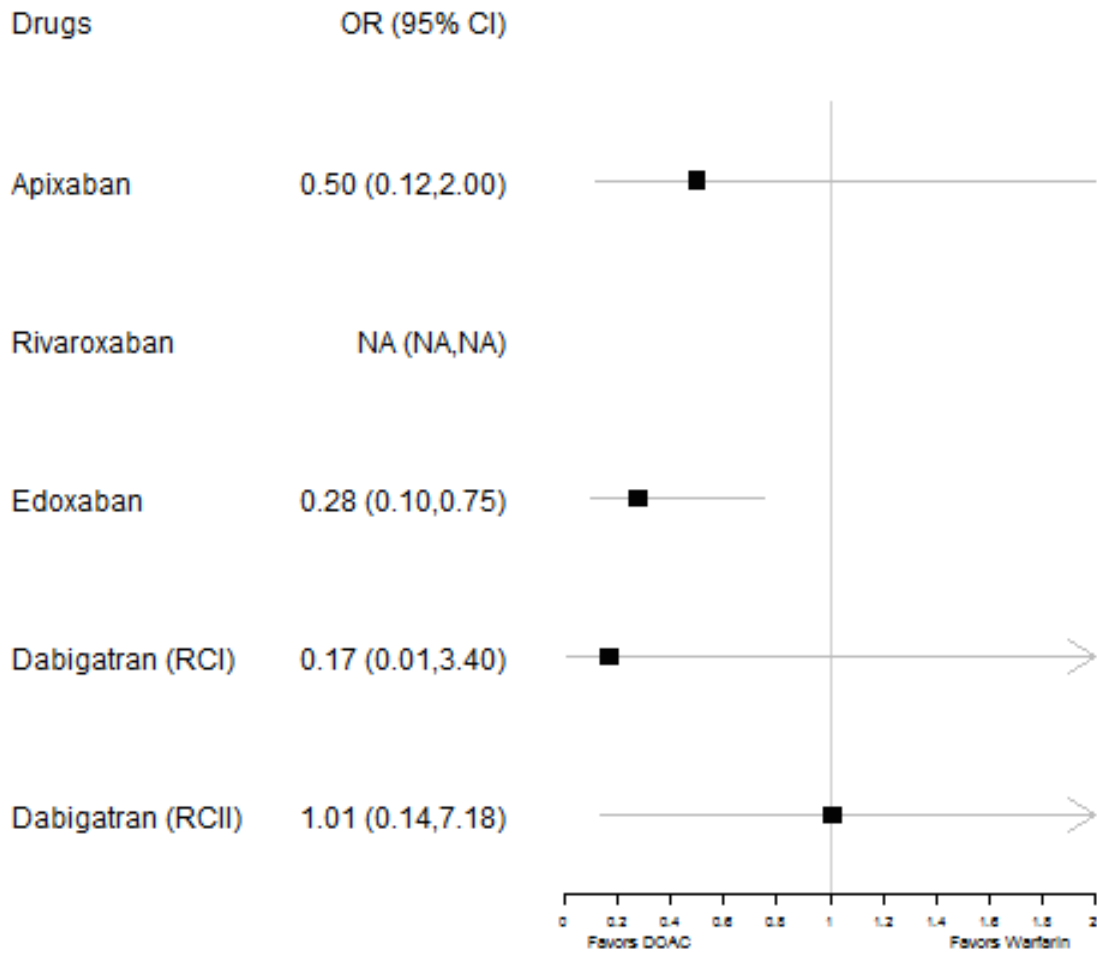

## ALT > 3xULN

Generalized linear mixed model fit by maximum likelihood (Adaptive Gauss-Hermite Quadrature, nAGQ = 7) ['glmerMod']

Family: binomial ( logit )

Formula: cbind(ADEs[, i], nADEs[, i]) ~ as.factor(arm) + as.factor(id) + (-1 + arm | id)

| AIC  | BIC  | logLik | deviance | df.resid |
|------|------|--------|----------|----------|
| 24.8 | 25.3 | -6.4   | 12.8     | 2        |

Scaled residuals:

| Min      | 1Q       | Median   | 3Q      | Max     |
|----------|----------|----------|---------|---------|
| -0.37833 | -0.31366 | -0.01216 | 0.24833 | 0.34724 |

Random effects:

| Groups | Name | Variance | Std.Dev. |
|--------|------|----------|----------|
|--------|------|----------|----------|

|    |     |        |        |
|----|-----|--------|--------|
| id | arm | 0.1674 | 0.4092 |
|----|-----|--------|--------|

Number of obs: 8, groups: id, 4

Fixed effects:

|                 | Estimate | Std. Error | z value | Pr(> z )    |
|-----------------|----------|------------|---------|-------------|
| (Intercept)     | -3.17499 | 0.14458    | -21.961 | < 2e-16 *** |
| as.factor(arm)1 | -0.57433 | 0.22651    | -2.536  | 0.01123 *   |
| as.factor(id)3  | -0.09717 | 0.19455    | -0.499  | 0.61743     |
| as.factor(id)4  | 0.32629  | 0.16995    | 1.920   | 0.05487 .   |
| as.factor(id)5  | -0.54432 | 0.17355    | -3.136  | 0.00171 **  |

---

Signif. codes: 0 '\*\*\*' 0.001 '\*\*' 0.01 '\*' 0.05 '.' 0.1 ' ' 1

Correlation of Fixed Effects:

| (Intr)      | as.()1 | as.()3 | as.()4 |       |
|-------------|--------|--------|--------|-------|
| as.fctr(r)1 | -0.155 |        |        |       |
| as.fctr(d)3 | -0.750 | 0.024  |        |       |
| as.fctr(d)4 | -0.861 | 0.079  | 0.659  |       |
| as.fctr(d)5 | -0.797 | 0.055  | 0.593  | 0.681 |



### Odds Ratio of Studies for ALT > 3xULN

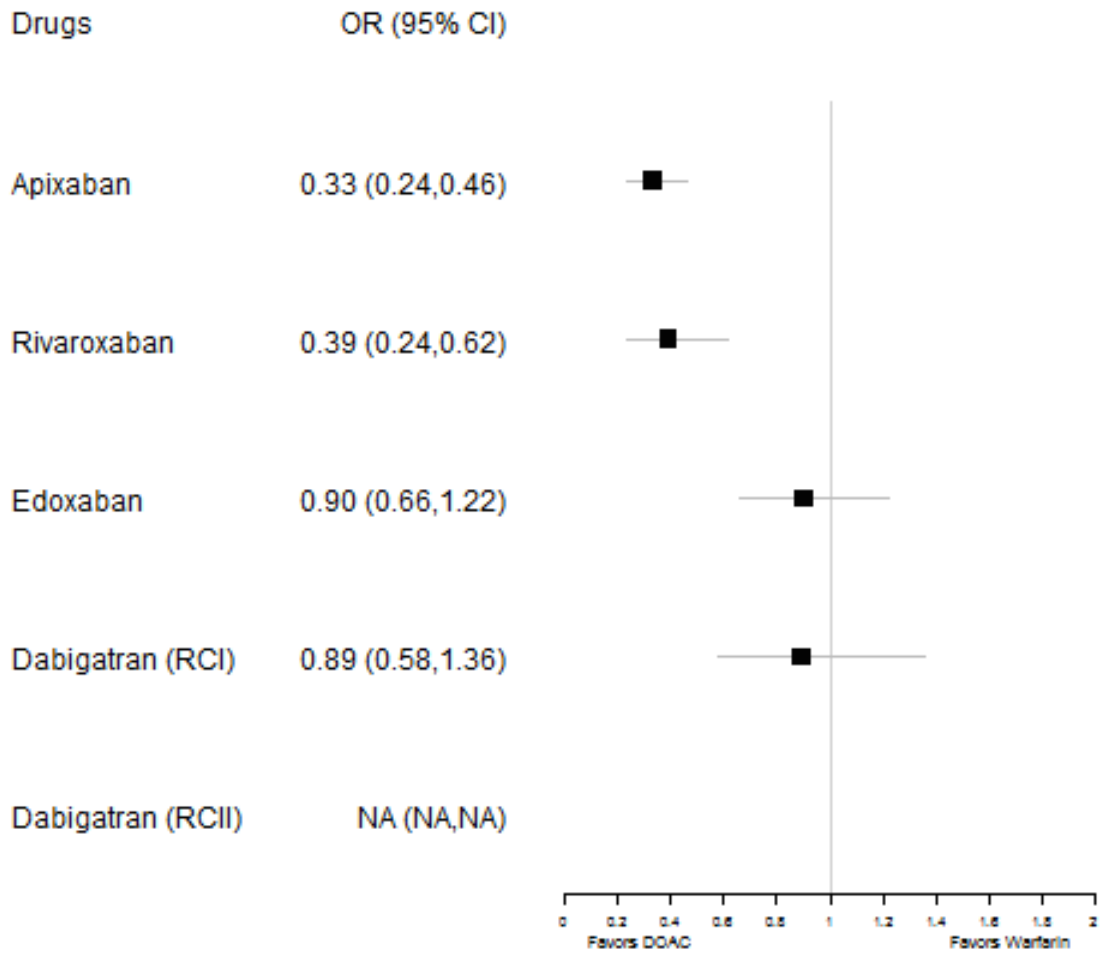

## Gastrointestinal bleeding

Generalized linear mixed model fit by maximum likelihood (Adaptive Gauss-Hermite Quadrature, nAGQ = 7) ['glmerMod']

Family: binomial ( logit )

Formula: cbind(ADEs[, i], nADEs[, i]) ~ as.factor(arm) + as.factor(id) + (-1 + arm | id)

| AIC  | BIC  | logLik | deviance | df.resid |
|------|------|--------|----------|----------|
| 19.3 | 18.2 | -4.6   | 9.3      | 1        |

Scaled residuals:

| Min      | 1Q       | Median   | 3Q      | Max     |
|----------|----------|----------|---------|---------|
| -1.01435 | -0.29156 | -0.01378 | 0.25732 | 0.88046 |

Random effects:

| Groups | Name | Variance | Std.Dev. |
|--------|------|----------|----------|
|--------|------|----------|----------|

|    |     |        |        |
|----|-----|--------|--------|
| id | arm | 0.1361 | 0.3689 |
|----|-----|--------|--------|

Number of obs: 6, groups: id, 3

Fixed effects:

|                 | Estimate | Std. Error | z value | Pr(> z )     |
|-----------------|----------|------------|---------|--------------|
| (Intercept)     | -3.50915 | 0.16817    | -20.867 | < 2e-16 ***  |
| as.factor(arm)1 | 0.08666  | 0.30441    | 0.285   | 0.776        |
| as.factor(id)2  | -0.08124 | 0.22098    | -0.368  | 0.713        |
| as.factor(id)4  | -1.69853 | 0.40471    | -4.197  | 2.71e-05 *** |

---

Signif. codes: 0 '\*\*\*' 0.001 '\*\*' 0.01 '\*' 0.05 '.' 0.1 ' ' 1

Correlation of Fixed Effects:

|             | (Intr) | as.()1 | as.()2 |
|-------------|--------|--------|--------|
| as.fctr(r)1 |        | -0.058 |        |
| as.fctr(d)2 | -0.647 |        | -0.021 |
| as.fctr(d)4 | -0.569 | -0.392 | 0.288  |

### Odds Ratio of Studies for Gastrointestinal Bleeding

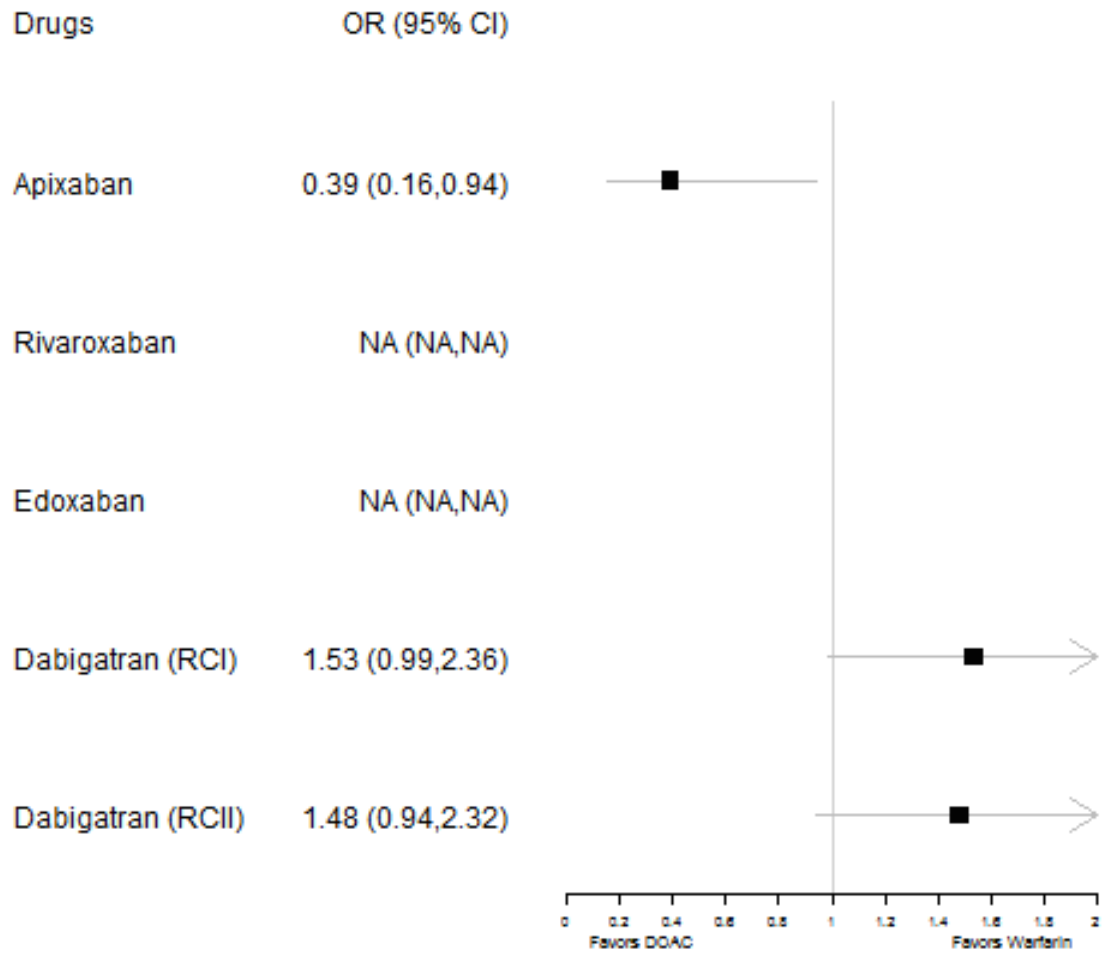

## Non-major relevant bleeding

Generalized linear mixed model fit by maximum likelihood (Adaptive Gauss-Hermite Quadrature, nAGQ = 7) ['glmerMod']

Family: binomial ( logit )

Formula: cbind(ADEs[, i], nADEs[, i]) ~ as.factor(arm) + as.factor(id) + (-1 + arm | id)

| AIC  | BIC  | logLik | deviance | df.resid |
|------|------|--------|----------|----------|
| 21.4 | 20.3 | -5.7   | 11.4     | 1        |

Scaled residuals:

| Min      | 1Q       | Median  | 3Q      | Max     |
|----------|----------|---------|---------|---------|
| -0.41013 | -0.24558 | 0.00297 | 0.23940 | 0.31422 |

Random effects:

| Groups | Name | Variance | Std.Dev. |
|--------|------|----------|----------|
|--------|------|----------|----------|

|    |     |         |        |
|----|-----|---------|--------|
| id | arm | 0.09464 | 0.3076 |
|----|-----|---------|--------|

Number of obs: 6, groups: id, 3

Fixed effects:

|                 | Estimate | Std. Error | z value | Pr(> z )   |
|-----------------|----------|------------|---------|------------|
| (Intercept)     | -2.56402 | 0.09429    | -27.193 | <2e-16 *** |
| as.factor(arm)1 | -0.31886 | 0.18927    | -1.685  | 0.092 .    |
| as.factor(id)4  | 0.09965  | 0.12153    | 0.820   | 0.412      |
| as.factor(id)5  | 0.24415  | 0.10743    | 2.273   | 0.023 *    |

---

Signif. codes: 0 '\*\*\*' 0.001 '\*\*' 0.01 '\*' 0.05 '.' 0.1 ' ' 1

Correlation of Fixed Effects:

|             | (Intr) | as.()1 | as.()4 |
|-------------|--------|--------|--------|
| as.fctr(r)1 | -0.157 |        |        |
| as.fctr(d)4 | -0.801 | 0.049  |        |
| as.fctr(d)5 | -0.864 | 0.086  | 0.693  |

### Odds Ratio of Studies for Non-major Relevent Bleeding

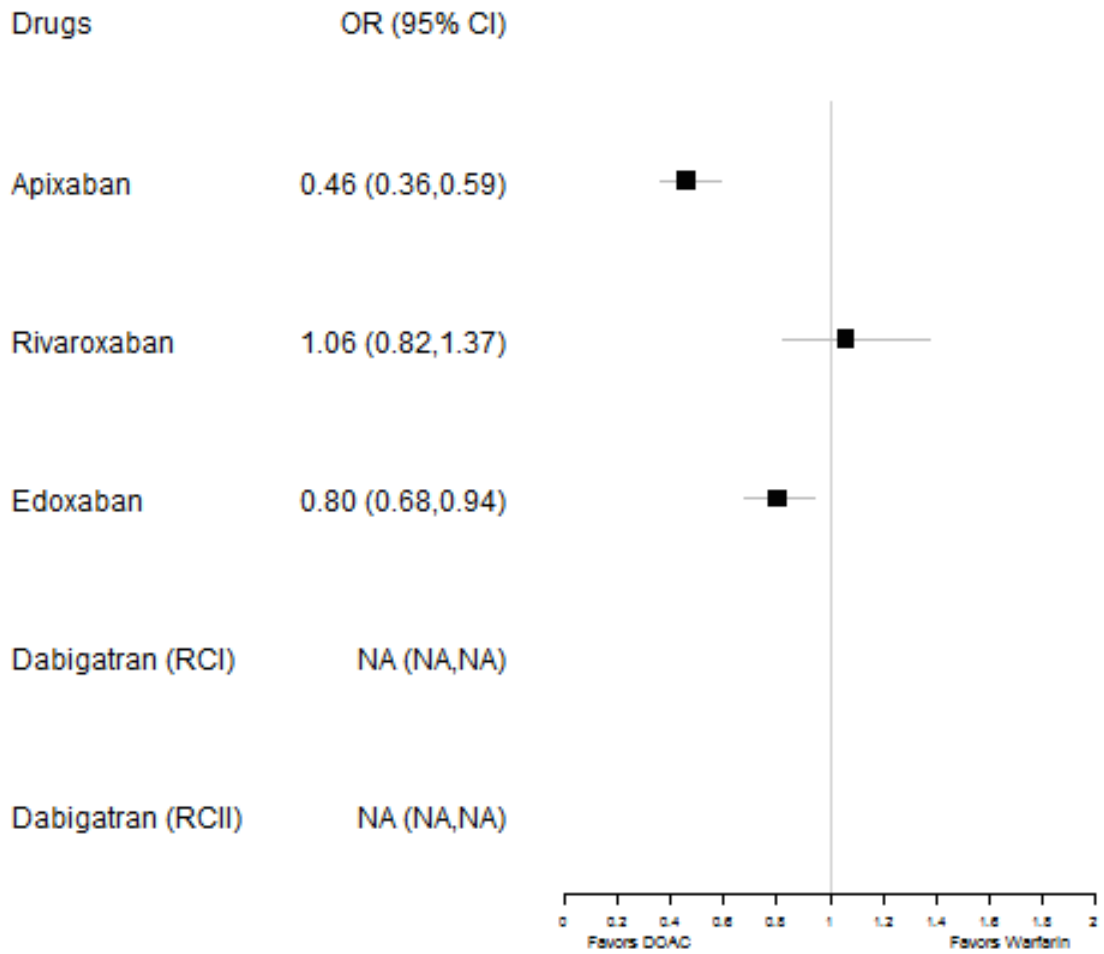

## Serious adverse event

Generalized linear mixed model fit by maximum likelihood (Adaptive Gauss-Hermite Quadrature, nAGQ = 7) ['glmerMod']

Family: binomial ( logit )

Formula: cbind(ADEs[, i], nADEs[, i]) ~ as.factor(arm) + as.factor(id) + (-1 + arm | id)

| AIC  | BIC  | logLik | deviance | df.resid |
|------|------|--------|----------|----------|
| 18.7 | 20.8 | -2.4   | 4.7      | 3        |

Scaled residuals:

| Min      | 1Q       | Median  | 3Q      | Max     |
|----------|----------|---------|---------|---------|
| -0.94906 | -0.57324 | 0.00324 | 0.57783 | 0.93815 |

Random effects:

Groups Name Variance Std.Dev.

id arm 0 0

Number of obs: 10, groups: id, 5

Fixed effects:

|                 | Estimate | Std. Error | z value | Pr(> z )     |
|-----------------|----------|------------|---------|--------------|
| (Intercept)     | -1.93634 | 0.06332    | -30.580 | < 2e-16 ***  |
| as.factor(arm)1 | -0.03644 | 0.03969    | -0.918  | 0.358519     |
| as.factor(id)2  | -0.03495 | 0.08546    | -0.409  | 0.682529     |
| as.factor(id)3  | 0.02282  | 0.07914    | 0.288   | 0.773041     |
| as.factor(id)4  | 0.25197  | 0.07109    | 3.544   | 0.000394 *** |
| as.factor(id)5  | 0.02725  | 0.06869    | 0.397   | 0.691562     |

---

Signif. codes: 0 '\*\*\*' 0.001 '\*\*' 0.01 '\*' 0.05 '.' 0.1 ' ' 1

Correlation of Fixed Effects:

| (Intr)      | as.()1 | as.()2 | as.()3 | as.()4 |       |
|-------------|--------|--------|--------|--------|-------|
| as.fctr(r)1 | -0.310 |        |        |        |       |
| as.fctr(d)2 | -0.670 | 0.001  |        |        |       |
| as.fctr(d)3 | -0.723 | 0.000  | 0.536  |        |       |
| as.fctr(d)4 | -0.805 | 0.001  | 0.597  | 0.644  |       |
| as.fctr(d)5 | -0.834 | 0.001  | 0.617  | 0.667  | 0.742 |

### Odds Ratio of Studies for Serious Adverse Event

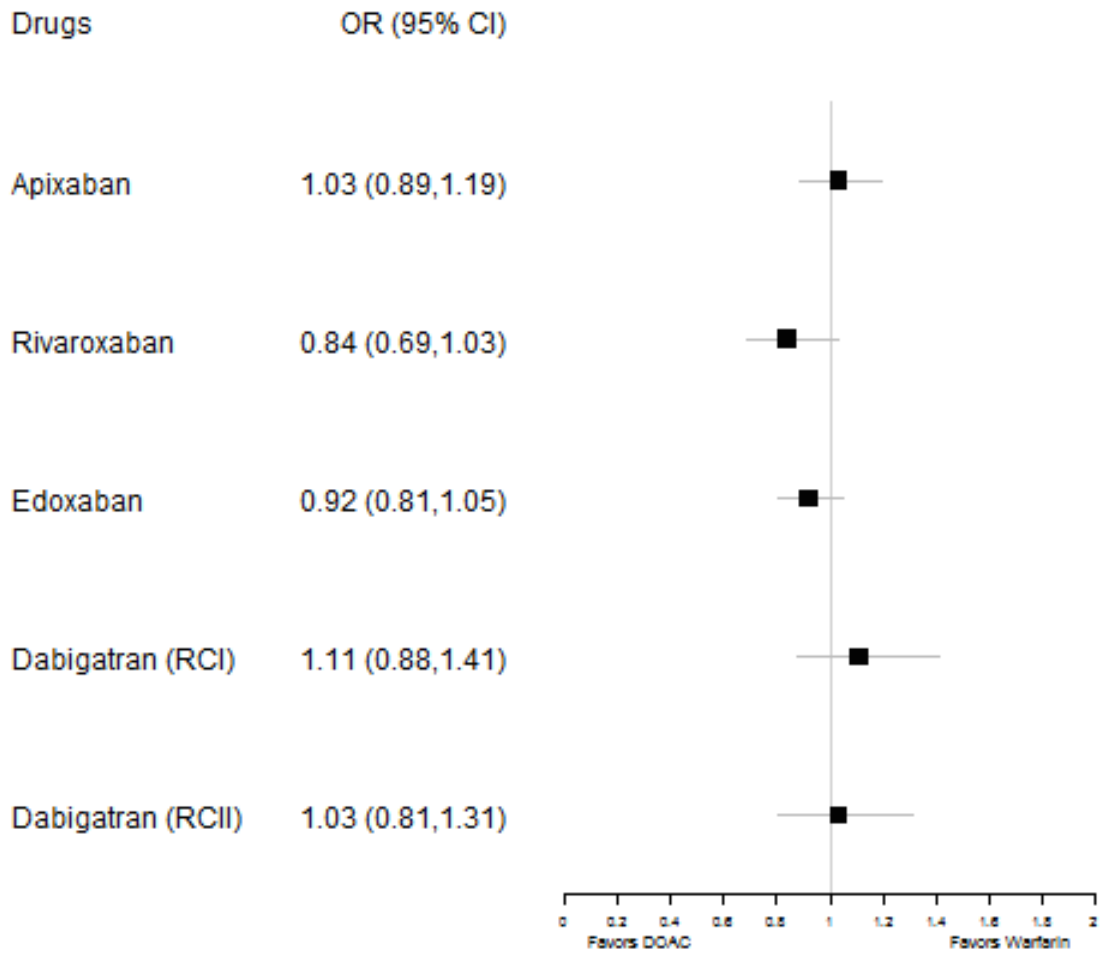

## Medication stopped (ADE)

Generalized linear mixed model fit by maximum likelihood (Adaptive Gauss-Hermite Quadrature, nAGQ = 7) ['glmerMod']

Family: binomial ( logit )

Formula: cbind(ADEs[, i], nADEs[, i]) ~ as.factor(arm) + as.factor(id) + (-1 + arm | id)

| AIC  | BIC  | logLik | deviance | df.resid |
|------|------|--------|----------|----------|
| 20.8 | 22.9 | -3.4   | 6.8      | 3        |

Scaled residuals:

| Min      | 1Q       | Median  | 3Q      | Max     |
|----------|----------|---------|---------|---------|
| -1.27533 | -0.57082 | 0.00149 | 0.56514 | 1.28553 |

Random effects:

Groups Name Variance Std.Dev.

id arm 0 0

Number of obs: 10, groups: id, 5

Fixed effects:

|                 | Estimate | Std. Error | z value | Pr(> z )     |
|-----------------|----------|------------|---------|--------------|
| (Intercept)     | -2.30305 | 0.07648    | -30.112 | < 2e-16 ***  |
| as.factor(arm)1 | -0.02615 | 0.06473    | -0.404  | 0.686        |
| as.factor(id)2  | -0.13932 | 0.10084    | -1.382  | 0.167        |
| as.factor(id)3  | -0.66234 | 0.10559    | -6.273  | 3.55e-10 *** |
| as.factor(id)4  | -0.40262 | 0.08961    | -4.493  | 7.02e-06 *** |
| as.factor(id)5  | -2.16771 | 0.12574    | -17.239 | < 2e-16 ***  |

---

Signif. codes: 0 '\*\*\*' 0.001 '\*\*' 0.01 '\*' 0.05 '.' 0.1 ' ' 1

Correlation of Fixed Effects:

| (Intr)      | as.()1 | as.()2 | as.()3 | as.()4 |       |
|-------------|--------|--------|--------|--------|-------|
| as.fctr(r)1 | -0.420 |        |        |        |       |
| as.fctr(d)2 | -0.626 | 0.002  |        |        |       |
| as.fctr(d)3 | -0.597 | 0.001  | 0.453  |        |       |
| as.fctr(d)4 | -0.704 | 0.002  | 0.533  | 0.509  |       |
| as.fctr(d)5 | -0.502 | 0.001  | 0.380  | 0.363  | 0.428 |



### Odds Ratio of Studies for Medication Stopped (ADE)

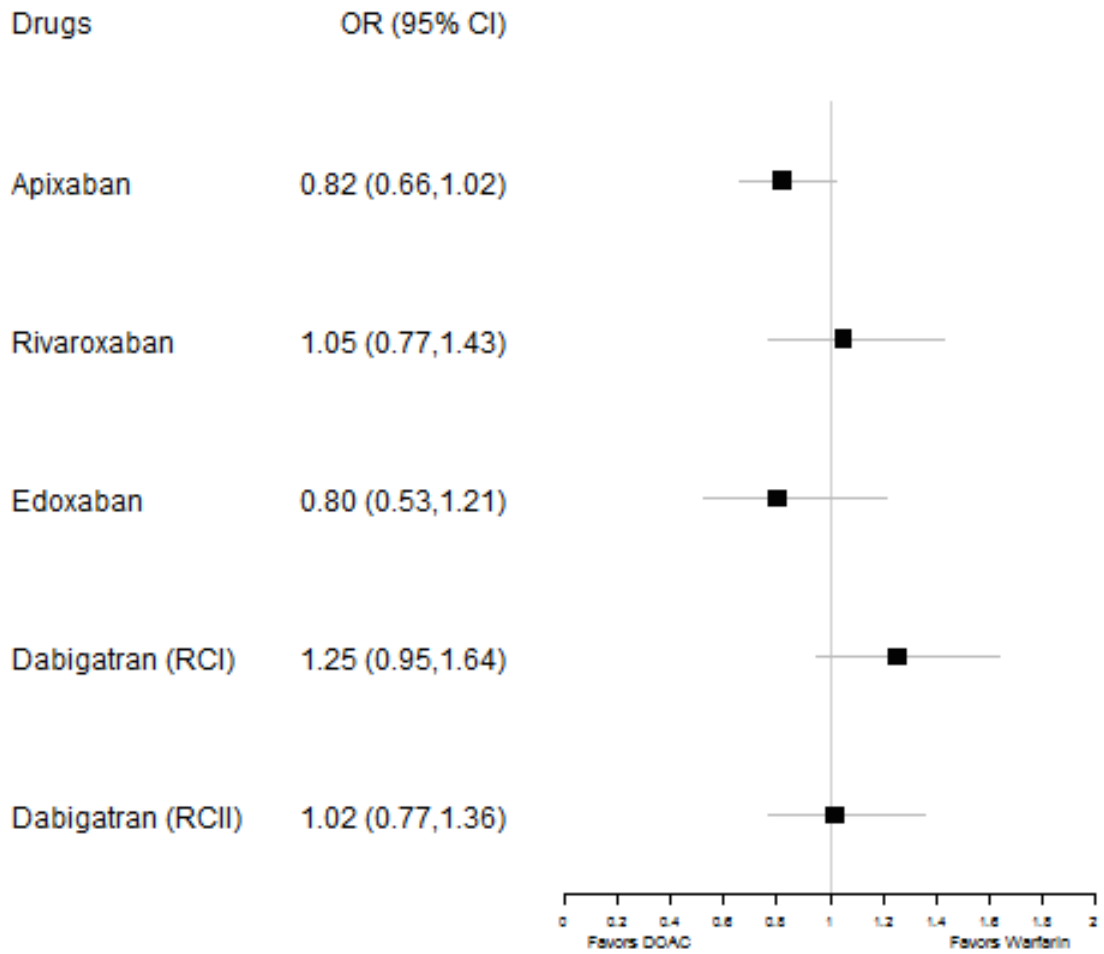

Supplement: pone.0197583.s009.pdf [file pone.0197583.s009.pdf]
