# Supplementary material for: Efficacy and safety of direct oral anticoagulants approved for cardiovascular indications: Systematic review and meta-analysis
Source: PubMed Central journal article supplement (PMC5967718; doi:10.1371/journal.pone.0197583), 2018-05-24
Supplement: pone.0197583.s004.pdf [file pone.0197583.s004.pdf]

## **Risk-of-bias Assessment**

Supplement to: Makam RCP, Hoaglin DC, McManus DD, Wang V, Gore JM, Spencer FA, Pradhan R, Tran H, Yu H, Goldberg RJ.  
Efficacy and safety of direct oral anticoagulants approved for cardiovascular indications: systematic review and meta-analysis.

|                                                                             | NVAF Studies    |                     |                 |                 | VTE Studies     |                     |                 |                 |                 |
|-----------------------------------------------------------------------------|-----------------|---------------------|-----------------|-----------------|-----------------|---------------------|-----------------|-----------------|-----------------|
|                                                                             | ARISTOTLE       | RE-LY 150           | ROCKET AF       | ENGAGE AF       | AMPLIFY         | EINSTEIN-DVT        | Hokusai-VTE     | RECOVER         | RECOVER-2       |
| Random sequence generation (selection bias)                                 | Low risk        | Low risk            | Low risk        | Low risk        | Low risk        | Low risk            | Low risk        | Low risk        | Low risk        |
| Allocation concealment (selection bias)                                     | Low risk        | Low risk            | Low risk        | Low risk        | Low risk        | Low risk            | Low risk        | Low risk        | Low risk        |
| Blinding of participants and personnel (performance bias)                   | Low risk        | Unclear risk        | Low risk        | Low risk        | Low risk        | Unclear risk        | Low risk        | Low risk        | Low risk        |
| Blinding of outcome assessment (detection bias) (patient-reported outcomes) | Low risk        | Unclear risk        | Low risk        | Low risk        | Low risk        | Unclear risk        | Low risk        | Low risk        | Low risk        |
| Blinding of outcome assessment (detection bias) (Mortality)                 | Low risk        | Unclear risk        | Low risk        | Low risk        | Low risk        | Unclear risk        | Low risk        | Low risk        | Low risk        |
| Incomplete outcome data addressed (attrition bias)                          | Low risk        | Unclear risk        | Low risk        | Low risk        | Low risk        | Low risk            | Unclear risk    | Unclear risk    | Low risk        |
| Selective reporting (reporting bias)                                        | Low risk        | Unclear risk        | Low risk        | Low risk        | Low risk        | Low risk            | Low risk        | Low risk        | Low risk        |
| <b>Summary Judgment</b>                                                     | <b>Low risk</b> | <b>Unclear risk</b> | <b>Low risk</b> | <b>Low risk</b> | <b>Low risk</b> | <b>Unclear risk</b> | <b>Low risk</b> | <b>Low risk</b> | <b>Low risk</b> |
