# Supplementary material for: Efficacy and safety of direct oral anticoagulants approved for cardiovascular indications: Systematic review and meta-analysis
Source: PubMed Central journal article supplement (PMC5967718; doi:10.1371/journal.pone.0197583), 2018-05-24
Supplement: pone.0197583.s005.pdf [file pone.0197583.s005.pdf]

## **Data Extraction**

Supplement to: Makam RCP, Hoaglin DC, McManus DD, Wang V, Gore JM, Spencer FA, Pradhan R, Tran H, Yu H, Goldberg RJ. Efficacy and safety of direct oral anticoagulants approved for cardiovascular indications: systematic review and meta-analysis.

# Efficacy Data Abstraction Form

RCT: \_\_\_\_\_

Year: \_\_\_\_\_

## Efficacy outcomes

Death from any cause

Death from vascular causes

Death related to pulmonary embolism

Death where pulmonary embolism could not be ruled out

Any Stroke

Hemorrhagic stroke

Ischemic stroke

Stroke or systemic embolism

Systemic embolism

Myocardial infarction

Fatal pulmonary embolism

Nonfatal pulmonary embolism

Recurrent pulmonary embolism (fatal/non-fatal)

Recurrent pulmonary embolism (non fatal)

Venous thromboembolism or related death during the study period

Recurrent Venous thromboembolism and related death

Symptomatic deep-vein thrombosis

Recurrent deep-vein thrombosis

Net clinical benefit in terms of Venous thromboembolism plus major bleeding

## Efficacy Data Extracted: Non-valvular atrial fibrillation

|                                                                              | <b>ARISTOTLE</b>       |                        |
|------------------------------------------------------------------------------|------------------------|------------------------|
|                                                                              | Apixaban<br>(N = 9120) | Warfarin<br>(N = 9081) |
| Stroke or systemic embolism                                                  | 212                    | 265                    |
| Any Stroke                                                                   | 199                    | 250                    |
| Ischemic or uncertain type of stroke                                         | 162                    | 175                    |
| Hemorrhagic stroke                                                           | 40                     | 78                     |
| Systemic embolism                                                            | 15                     | 17                     |
| Death from any cause                                                         | 603                    | 669                    |
| Stroke, systemic embolism,<br>or death from any cause                        | 752                    | 837                    |
| Myocardial infarction                                                        | 90                     | 102                    |
| Stroke, systemic embolism, myocardial<br>infarction, or death from any cause | 810                    | 906                    |
| Pulmonary embolism or<br>deep-vein thrombosis                                | 7                      | 9                      |

|                                      | <b>RE-LY - 150</b>                  |                        |
|--------------------------------------|-------------------------------------|------------------------|
|                                      | Dabigatran,<br>150 mg<br>(N = 6076) | Warfarin<br>(N = 6022) |
| Stroke or systemic embolism          | 134                                 | 199                    |
| Any Stroke                           | 122                                 | 185                    |
| Ischemic or uncertain type of stroke | 111                                 | 142                    |
| Hemorrhagic stroke                   | 12                                  | 45                     |
| Death from any cause                 | 438                                 | 487                    |
| Myocardial infarction                | 89                                  | 63                     |
| Nondisabling stroke                  | 44                                  | 69                     |
| Disabling or fatal stroke            | 80                                  | 118                    |
| Pulmonary embolism                   | 18                                  | 11                     |
| Hospitalization                      | 2439                                | 2458                   |
| Death from vascular causes           | 274                                 | 317                    |

|                                                                     | <b>ROCKET AF</b>        |                      |
|---------------------------------------------------------------------|-------------------------|----------------------|
|                                                                     | Rivaroxaban<br>(N=6958) | Warfarin<br>(N=7004) |
| Stroke or systemic embolism                                         | 188                     | 241                  |
| Any Stroke                                                          | 184                     | 221                  |
| Ischemic or uncertain type of stroke                                |                         |                      |
| Hemorrhagic stroke                                                  | 29                      | 50                   |
| Systemic embolism                                                   | 5                       | 22                   |
| Death from any cause                                                | 208                     | 250                  |
| Myocardial infarction                                               | 101                     | 126                  |
| Nondisabling stroke                                                 | 88                      | 87                   |
| Death from vascular causes                                          | 170                     | 193                  |
| Stroke, non-CNS embolism, and vascular death                        | 346                     | 410                  |
| Stroke, non-CNS embolism, vascular death, and myocardial infarction | 433                     | 519                  |
| Fatal stroke                                                        | 47                      | 67                   |
| Disabling stroke                                                    | 43                      | 57                   |
| Ischemic stroke                                                     | 149                     | 161                  |

|                                                                        | <b>ENGAGE-AF</b>       |                      |
|------------------------------------------------------------------------|------------------------|----------------------|
|                                                                        | Edoxaban<br>(N = 7035) | Warfarin<br>(N=7036) |
| Stroke or systemic embolism                                            | 182                    | 232                  |
| Any Stroke                                                             | 281                    | 317                  |
| Ischemic or uncertain type of stroke                                   | 236                    | 235                  |
| Hemorrhagic stroke                                                     | 49                     | 90                   |
| Systemic embolism                                                      | 15                     | 23                   |
| Death from any cause                                                   | 773                    | 839                  |
| Stroke, systemic embolism,<br>or death from any cause                  | 949                    | 1046                 |
| Myocardial infarction                                                  | 133                    | 141                  |
| Disabling or fatal stroke                                              | 132                    | 135                  |
| Death from vascular causes                                             | 530                    | 611                  |
| Stroke, non-CNS embolism, and<br>vascular death                        | 728                    | 831                  |
| Stroke, non-CNS embolism,<br>vascular death, and myocardial infarction | 827                    | 926                  |
| Fatal stroke                                                           | 80                     | 86                   |
| Nondisabling and nonfatal stroke                                       | 154                    | 190                  |
| Stroke, systemic embolic event, or<br>death from cardiovascular causes | 728                    | 831                  |
| Death from cardiovascular causes                                       | 530                    | 611                  |
| Ischemic stroke                                                        | 236                    | 235                  |
| Death or disabling stroke                                              | 812                    | 878                  |
| Death or intracranial hemorrhage                                       | 817                    | 926                  |

## Efficacy Data Extracted: Venous Thromboembolism

|                                                                                                     | <b>RE-COVER</b>        |                        |
|-----------------------------------------------------------------------------------------------------|------------------------|------------------------|
|                                                                                                     | Dabigatran<br>(N=1274) | Warfarin<br>(N = 1265) |
| Venous thromboembolism or related death during the study period                                     | 30                     | 27                     |
| Venous thromboembolism or related death during the study period plus an additional 30-day follow-up | 34                     | 32                     |
| Symptomatic deep-vein thrombosis                                                                    | 16                     | 18                     |
| Symptomatic nonfatal pulmonary embolism                                                             | 13                     | 7                      |
| Death related to venous thromboembolism                                                             | 1                      | 3                      |
| All deaths                                                                                          | 21                     | 21                     |
| Myocardial infarction                                                                               | 4                      | 2                      |

|                                                                                                     | <b>RE-COVER II</b>     |                      |
|-----------------------------------------------------------------------------------------------------|------------------------|----------------------|
|                                                                                                     | Dabigatran<br>(N=1279) | Warfarin<br>(n=1289) |
| Venous thromboembolism or related death during the study period                                     | 30                     | 28                   |
| Venous thromboembolism or related death during the study period plus an additional 30-day follow-up | 34                     | 30                   |
| Symptomatic deep-vein thrombosis                                                                    | 25                     | 17                   |
| Symptomatic nonfatal pulmonary embolism                                                             | 7                      | 13                   |
| All deaths                                                                                          | 25                     | 25                   |
| Death related to pulmonary embolism                                                                 | 3                      | 0                    |
| Myocardial infarction                                                                               | 4                      | 2                    |

|                                                          | <b>EINSTEIN DVT</b>         |                                |
|----------------------------------------------------------|-----------------------------|--------------------------------|
|                                                          | Rivaroxaban<br>(ITT N=1731) | Enoxaparin-VKA<br>(ITT N=1718) |
| Symptomatic deep-vein thrombosis                         | 14                          | 28                             |
| Symptomatic nonfatal pulmonary embolism                  | 20                          | 18                             |
| All deaths                                               | 38                          | 49                             |
| Death related to pulmonary embolism                      | 4                           | 6                              |
| Recurrent VTE                                            | 36                          | 51                             |
| Fatal PE                                                 | 1                           | 0                              |
| Nonfatal PE                                              | 20                          | 18                             |
| Recurrent DVT plus PE                                    | 1                           | 0                              |
| Recurrent DVT                                            | 14                          | 28                             |
| Net clinical benefit in terms of VTE plus major bleeding | 51                          | 73                             |
| Myocardial infarction                                    | 5                           | 1                              |
| Ischemic stroke                                          | 3                           | 5                              |

|                                                                 | <b>AMPLIFY</b>         |                                    |
|-----------------------------------------------------------------|------------------------|------------------------------------|
|                                                                 | Apixaban<br>(N = 2609) | Conventional Therapy<br>(N = 2635) |
| Venous thromboembolism or related death during the study period | 59                     | 71                                 |
| All deaths                                                      | 41 out of 2676         | 52 out of 2689                     |
| Fatal PE                                                        | 1                      | 2                                  |
| Death where PE could not be ruled out                           | 11                     | 13                                 |
| Nonfatal PE                                                     | 27                     | 23                                 |
| Recurrent DVT                                                   | 20                     | 33                                 |
| Net clinical benefit in terms of VTE plus major bleeding        | 73                     | 118                                |
| VTE or death from cardiovascular cause                          | 61                     | 77                                 |
| VTE or death from any cause                                     | 84                     | 104                                |
| VTE, VTE-related death, or major bleeding                       | 73                     | 118                                |
| Myocardial infarction                                           | 4                      | 2                                  |
| Ischemic stroke                                                 | 6                      | 3                                  |
| Hemorrhagic stroke                                              | 2                      | 5                                  |

|                                                                 | <b>Hokusai-VTE</b>    |                        |
|-----------------------------------------------------------------|-----------------------|------------------------|
|                                                                 | Edoxaban<br>(N= 4118) | Warfarin<br>(N = 4122) |
| Venous thromboembolism or related death during the study period | 130                   | 146                    |
| All deaths                                                      | 132                   | 126                    |
| Fatal PE                                                        | 4                     | 3                      |
| Death where PE could not be ruled out                           | 20                    | 21                     |
| Nonfatal PE                                                     | 49                    | 59                     |
| Recurrent DVT                                                   | 57                    | 63                     |
| Net clinical benefit in terms of VTE plus major bleeding        | 120                   | 144                    |
| VTE or death from any cause                                     | 228                   | 228                    |
| Myocardial infarction                                           | 20                    | 13                     |
| Ischemic stroke                                                 | 26                    | 26                     |

# Safety Data Abstraction Form

RCT: \_\_\_\_\_

Year: \_\_\_\_\_

## Adverse Drug Events

Major bleeding

Life threatening

Non-life threatening

Gastrointestinal

Intracranial bleeding

Extracranial bleeding

Minor bleeding

Major or minor bleeding

Net clinical benefit outcome

## Other Adverse events

Dyspepsia

Dizziness

Dyspnea

Peripheral edema

Fatigue

Cough

Chest pain

Back pain 316

Arthralgia

Nasopharyngitis

Diarrhea

Atrial fibrillation

Urinary tract infection

Upper respiratory tract infection

## Liver function

ALT or AST >3× ULN

ALT or AST >3× ULN with concurrent bilirubin >2× ULN

Hepatobiliary disorder

Serious adverse event

Non-serious adverse event

Any other ADEs not listed above\_\_\_\_\_

## **Study-drug discontinuation**

Discontinued at 1 yr

Discontinued at 2 yr

Reason for discontinuation

Patient's decision

Outcome event

Serious adverse event

Gastrointestinal symptoms

Gastrointestinal bleeding

## Safety Data Extracted: Non-valvular atrial fibrillation

|                             | <b>ARISTOTLE</b>      |                      |
|-----------------------------|-----------------------|----------------------|
|                             | Apixaban<br>(N= 9088) | Warfarin<br>(N=9052) |
| Major bleeding              | 327                   | 462                  |
| Fatal bleeding              | 34                    | 55                   |
| Intracranial bleeding       | 52                    | 122                  |
| Gastrointestinal bleeding   | 105                   | 119                  |
| Non-major relevant bleeding | 286                   | 415                  |
| Non ICB GIB major bleeding  | 275                   | 340                  |
| All-cause mortality         | 603                   | 669                  |

|                                 | <b>RE-LY – 150</b>   |                        |
|---------------------------------|----------------------|------------------------|
|                                 | Warfarin<br>(N=6022) | Dabigatran<br>(N=6076) |
| Major bleeding                  | 421                  | 399                    |
| Intracranial bleeding           | 90                   | 38                     |
| Gastrointestinal bleeding       | 126                  | 188                    |
| All-cause mortality             | 438                  | 487                    |
| All-cause mortality denominator | 6076                 | 6022                   |

|                                 | <b>ROCKET AF</b>        |                       |
|---------------------------------|-------------------------|-----------------------|
|                                 | Rivaroxaban<br>(N=7111) | Warfarin<br>(N= 7125) |
| Major bleeding                  | 395                     | 386                   |
| Fatal bleeding                  | 27                      | 55                    |
| Intracranial bleeding           | 55                      | 84                    |
| Gastrointestinal bleeding       | 224                     | 154                   |
| All cause mortality             | 208                     | 250                   |
| All cause mortality denominator | 7061                    | 7082                  |
| Non-major relevant bleeding     | 1185                    | 1151                  |

|                             | <b>ENGAGE AF-TIMI 48<br/>(high dose)</b> |                       |
|-----------------------------|------------------------------------------|-----------------------|
|                             | Edoxaban<br>(N= 7012)                    | Warfarin<br>(N= 7012) |
| Major bleeding              | 418                                      | 524                   |
| Fatal bleeding              | 32                                       | 59                    |
| Intracranial bleeding       | 61                                       | 132                   |
| Gastrointestinal bleeding   | 232                                      | 190                   |
| All-cause mortality         | 773                                      | 839                   |
| Loss >2g/dl                 | 317                                      | 327                   |
| Non-major relevant bleeding | 286                                      | 415                   |
| Any overt bleeding          | 1865                                     | 2114                  |
| Elevated LFT > 3 fold       | 5                                        | 2                     |

## Safety Data Extracted: Venous Thromboembolism

|                                    | RE-COVER                     |                      |
|------------------------------------|------------------------------|----------------------|
|                                    | Dabigatran (RCI)<br>(N=1273) | Warfarin<br>(N=1266) |
| All-cause mortality                | 21                           | 21                   |
| Major bleeding                     | 20                           | 24                   |
| Fatal bleeding                     | 1                            | 1                    |
| Intracranial bleeding              | 0                            | 3                    |
| Gastrointestinal bleeding          | 53                           | 35                   |
| Loss >2g/dl                        | 20                           | 18                   |
| Intramuscular bleeding             | 8                            | 27                   |
| Non-major relevant bleeding        | 51                           | 87                   |
| Any overt bleeding                 | 205                          | 277                  |
| Diarrhea                           | 57                           | 38                   |
| Edema                              | 43                           | 48                   |
| Epistaxis                          | 40                           | 107                  |
| Headache                           | 79                           | 88                   |
| ALT greater than 3xULN             | 42                           | 46                   |
| Serious adverse event              | 165                          | 150                  |
| Medication stopped (ADE)           | 126                          | 102                  |
| All-cause mortality denominator    | 1273                         | 1266                 |
| ALT greater than 3xULN denominator | 1220                         | 1199                 |

|                                 | <b>RE-COVER II</b>            |                      |
|---------------------------------|-------------------------------|----------------------|
|                                 | Dabigatran (RCII)<br>(N=1280) | Warfarin<br>(N=1288) |
| All-cause mortality             | 25                            | 25                   |
| Major bleeding                  | 15                            | 22                   |
| Fatal bleeding                  | 0                             | 1                    |
| Intracranial bleeding           | 2                             | 2                    |
| Gastrointestinal bleeding       | 48                            | 33                   |
| Loss >2g/dl                     | 13                            | 19                   |
| Intramuscular bleeding          | 6                             | 20                   |
| Serious adverse event           | 156                           | 153                  |
| Medication stopped (ADE)        | 102                           | 101                  |
| All-cause mortality denominator | 1280                          | 1288                 |

|                                    | <b>EINSTEIN-DVT</b>     |                                                   |
|------------------------------------|-------------------------|---------------------------------------------------|
|                                    | Rivaroxaban<br>(N=1718) | Enoxaparin,<br>Warfarin/acenocoumarol<br>(N=1711) |
| All-cause mortality                | 38                      | 49                                                |
| Major bleeding                     | 14                      | 20                                                |
| Fatal bleeding                     | 1                       | 5                                                 |
| ALT greater than 3xULN             | 25                      | 62                                                |
| Non-major relevant bleeding        | 126                     | 119                                               |
| Serious adverse event              | 201                     | 233                                               |
| Medication stopped (ADE)           | 85                      | 81                                                |
| All-cause mortality denominator    | 1718                    | 1711                                              |
| ALT greater than 3xULN denominator | 1680                    | 1649                                              |

|                                    | <b>AMPLIFY</b> |                      |
|------------------------------------|----------------|----------------------|
|                                    | Apixaban       | Enoxaparin, Warfarin |
| Safety Sample                      | 2676           | 2689                 |
| All-cause mortality                | 41             | 52                   |
| Major bleeding                     | 15             | 49                   |
| Fatal bleeding                     | 1              | 2                    |
| Intracranial bleeding              | 3              | 6                    |
| Gastrointestinal bleeding          | 7              | 18                   |
| ALT greater than 3xULN             | 50             | 145                  |
| Non-major relevant bleeding        | 103            | 215                  |
| Serious adverse event              | 417            | 410                  |
| Medication stopped (ADE)           | 150            | 182                  |
| All -cause mortality denominator   | 2676           | 2689                 |
| ALT greater than 3xULN denominator | 2601           | 2598                 |

|                                    | <b>Hokusai-VTE</b>   |                           |
|------------------------------------|----------------------|---------------------------|
|                                    | Edoxaban<br>(N=4118) | LMWH Warfarin<br>(N=4122) |
| All-cause mortality                | 132                  | 126                       |
| Major bleeding                     | 56                   | 66                        |
| Fatal bleeding                     | 2                    | 10                        |
| Intracranial bleeding              | 5                    | 18                        |
| Gastrointestinal bleeding          | 1                    | 2                         |
| ALT greater than 3xULN             | 81                   | 90                        |
| Non-major relevant bleeding        | 298                  | 368                       |
| Serious adverse event              | 503                  | 544                       |
| Medication stopped (ADE)           | 41                   | 51                        |
| All-cause mortality denominator    | 4118                 | 4122                      |
| ALT greater than 3xULN denominator | 3901                 | 3903                      |
